1 **Dynamic adult tracheal plasticity drives stem cell adaptation to changes in intestinal**  
2 **homeostasis.**

3 Jessica Perochon<sup>1</sup>, Yachuan Yu<sup>1,2</sup>, Gabriel N. Aughey<sup>3</sup>, Tony D. Southall<sup>3</sup> and Julia B.  
4 Cordero<sup>1,2\*</sup>.

5

6 <sup>1</sup> Institute of Cancer Sciences-University of Glasgow, Wolfson Wohl Cancer Research Centre  
7 Garscube Estate, Switchback Road, Glasgow, G61 1QH

8 <sup>2</sup> Cancer Research UK Beatson Institute, Garscube Estate, Switchback Road, Glasgow, G61  
9 1BD

10 <sup>3</sup> Department of Life Sciences, Imperial College London, London, SW7 2AZ.

11 \*Corresponding author: [Julia.Cordero@glasgow.ac.uk](mailto:Julia.Cordero@glasgow.ac.uk)

12

13 **Abstract**

14           Coordination of stem cell function by local and niche-derived signals is essential to  
15 preserve adult tissue homeostasis and organismal health. The vasculature is a prominent  
16 component of multiple stem cell niches. However, its role in adult intestinal homeostasis  
17 remains largely understudied. Here, we uncover a previously unrecognised crosstalk between  
18 adult intestinal stem cells (ISCs) in *Drosophila* and the vasculature-like tracheal system, which  
19 is essential for intestinal regeneration. Following damage to the intestinal epithelium, gut-  
20 derived reactive oxygen species (ROS) activate tracheal HIF-1 $\alpha$  and bidirectional FGF/FGFR  
21 signaling, leading to reversible remodelling of gut-associated terminal tracheal cells and ISC  
22 proliferation following damage. Unexpectedly, ROS-induced adult tracheal plasticity involves  
23 downregulation of the tracheal specification factor *trachealess* (*trh*) and upregulation of IGF2  
24 mRNA-binding protein (IGF2BP2/Imp). Our results reveal a novel intestine/vasculature inter-  
25 organ communication program, which is essential to adapt stem cells response to the  
26 proliferative demands of the intestinal epithelium.

27

28 **Main**

29           Adult intestinal plasticity is largely owed to the action of stem cells, which must respond  
30 to constant signals from the intestinal epithelium and its microenvironment, to fulfil global  
31 tissue demands<sup>1-3</sup>. Surprisingly, little is known about the role of the vascular microenvironment  
32 in adult intestinal homeostasis.

33           The *Drosophila* tracheal system is an oxygen-delivering interconnected tubular  
34 network, functionally analogous to the mammalian vascular and respiratory systems<sup>4</sup>.  
35 Following specification from epidermal cells and the formation of a tracheal sac in the embryo,  
36 tracheal cells undergo extensive cell rearrangements and cell shape changes, leading to the  
37 formation of multicellular tubes that ramify into progressively thinner branches, culminating  
38 with a terminal tracheal cell<sup>5</sup>. *Drosophila* terminal tracheal cells (TTCs), analogous to  
39 mammalian vascular tip cells<sup>6</sup>, extend prominent cytoplasmic projections, which supply  
40 oxygen to their target tissues<sup>4,5,7,8</sup>. While tracheal development and post-embryonic plasticity  
41 have been significantly studied in *Drosophila*<sup>5,9,10</sup>, there is scarce knowledge on the role and  
42 regulation of the adult tracheal system.

43           The adult *Drosophila* midgut shares remarkable homology with the mammalian  
44 intestine<sup>11</sup>. Critically, the midgut epithelium is maintained by intestinal stem cells (ISCs), which  
45 self-renew and replenish the differentiated intestinal lineage—secretory enteroendocrine cells  
46 and absorptive enterocytes—through the production of undifferentiated enteroblasts<sup>12,13</sup>. As  
47 its mammalian counterpart, the *Drosophila* gastrointestinal tract is densely tracheated<sup>14</sup>.  
48 Beyond the requirement for tracheal derived Dpp/BMP to restrain ISC proliferation<sup>15</sup>, there is  
49 no knowledge on the role of the tracheal system in adult midgut biology.

50           Here, we combine genetics and image analysis with *in vivo* functional and molecular  
51 studies to characterise a novel inter-organ communication program between the adult  
52 *Drosophila* midgut and its closely associated tracheal tissue, which is essential to shape stem  
53 cell and tracheal plasticity during intestinal regeneration.

54

55

56 **Results**

57

58 **Intestinal damage leads to dynamic and reversible remodelling of gut associated adult**  
59 **TTCs in *Drosophila*.**

60 The adult *Drosophila melanogaster* gut is extensively covered by TTCs, labelled with  
61 a *GAL4* reporter driven under the control of the *Drosophila* homologue of Serum Response  
62 Factor (dSRF)<sup>16-18</sup> (*dSRF>GFP*) (Fig.1a and Extended data Fig.1a). Transmission electron  
63 microscopy of adult posterior midguts denoted intimate contact between TTCs, enterocytes  
64 (ECs) (Fig.1b) and ISCs (Fig.1c). Oxygen and nutrient availability are two recognised  
65 determinants of TTC plasticity<sup>10, 19</sup>. We noticed that, damage to the adult *Drosophila* midgut  
66 epithelium caused by feeding animals with the pathogenic bacteria *Pseudomonas*  
67 *entomophila* (*Pe*)<sup>20-23</sup>, the DNA-damaging agent Bleomycin<sup>24-26</sup>, or the epithelial basement  
68 membrane disruptor Dextran Sulfate Sodium (DSS)<sup>25, 27</sup>, led to a significant increase in TTC  
69 coverage within the posterior midgut (Fig.1d, e and Extended data Fig.1b). Consideration of  
70 gut resizing upon *Pe* damage did not impact the overall increase in tracheal coverage  
71 (Extended data Fig.1c-e). GFP labelled single terminal tracheal cell clones, unambiguously  
72 confirmed the increase in total number of cellular branches derived from individual TTCs in  
73 damaged (*Pe*) versus control (Sucrose) midguts (Fig.1f, g). Interestingly, observation of single  
74 TTC clones within *Pe* treated midguts revealed direct correlation between the number of  
75 individual TTC branches and nearby PH3<sup>+</sup> ISCs (Fig.1h). Further quantification of tracheal  
76 phenotypes showed increase in primary, secondary and tertiary tracheal branches and total  
77 length of individual TTC extensions in damaged (*Pe*) versus control (Sucrose) midguts (Fig.1i-  
78 k). Quantification of TTC numbers or assessment of potential co-localization between TTC  
79 bodies and the cell proliferation marker PH3 revealed no evidence of TTC proliferation  
80 following midgut damage (Extended data Fig.1f, g). Collectively, these data suggest extensive  
81 cellular remodelling of TTCs in response to epithelial intestinal injury. A time course  
82 assessment of posterior midguts over a 16 hrs period of *Pe* infection (Damage phase) followed  
83 by 32 hrs on normal diet (Recovery phase) revealed direct correlation between tracheal



84 coverage and ISC proliferation (Fig.1l, m and Extended data Fig.1h, i). These results strongly  
85 suggest that adult gut-associated-tracheal remodelling is a highly dynamic and reversible  
86 process, which accompanies changes in intestinal homeostasis.

87 Low doses of whole body  $\gamma$ -irradiation in mice induce intestinal epithelial cell death,  
88 followed by a strong peak of crypt cell proliferation between 72- and 96 hrs after irradiation<sup>28</sup>.  
89 Staining with anti-CD31, showed an increase in vascular endothelial cells in regenerating  
90 (irradiated) versus control (non-irradiated) intestinal crypts (Fig.1n). These results indicate a  
91 conserved phenomenology of vasculature/tracheal response to damage in the adult intestinal  
92 epithelium.

93

#### 94 **TTC remodelling is necessary for ISC proliferation following damage of the adult** 95 ***Drosophila* midgut**

96 An essential step in the intestinal regenerative response to damage, involves a robust  
97 increase in ISC proliferation<sup>1, 20 22, 25, 29</sup> (Fig.1d, h). To address the functional role of the tracheal  
98 system in adult intestinal regeneration, we severely reduced trachea by overexpressing the  
99 pro-apoptotic gene *bax* (*UAS-bax*) in adult TTCs using temperature sensitive *dSRF-Gal4*  
100 (*dSRF<sup>ts</sup>>bax*) (Fig.2a, b). This caused a significant impairment of the regenerative response  
101 of the intestine to multiple damages, as evidenced by an approximate 50% decrease in  
102 damage induced ISC proliferation (Fig.2c). TTCs are best known for their role facilitating gas  
103 exchange with their target tissues<sup>4</sup>. Thus, poor intestinal regeneration following TTC reduction  
104 might reflect the need of oxygen in this process. Exposing animals to high and prolonged  
105 hypoxic environmental conditions, induced activity of a reporter of *Drosophila* Hypoxia-  
106 inducible factor-1 $\alpha$  (HIF-1 $\alpha$ /Sima)<sup>30</sup> and TTC remodelling in the adult midgut (Extended data  
107 Fig.2a-c). However, while hypoxia clearly impaired damage induced ISC proliferation in the  
108 adult midgut (Fig.2d), it did so to a lower extent than that observed upon TTC loss  
109 (*dSRF<sup>ts</sup>>bax*) (Fig.2c). This difference could be due to a compensatory effect of increased  
110 trachea upon hypoxia (Extended data Fig.2a, c) or compromised ISC survival in *dSRF<sup>ts</sup>>bax*  
111 midguts. We assessed apoptosis and ISC numbers in hypoxic and *dSRF<sup>ts</sup>>bax* midguts

112 through anti-caspase (Dcp-1) staining and the use of an ISC reporter (*Delta-LacZ*). Midguts  
113 overexpressing *bax* in adult ECs (*NP1<sup>ts</sup>>bax*), served as a ‘cell-death’ positive control  
114 (Extended data Fig.2d, f). While we saw no evidence of cell death in hypoxic midguts,  
115 *dSRF<sup>ts</sup>>bax* midguts showed significant apoptosis (Extended data Fig.2e, g), which was  
116 restricted to ECs, distinguished by their large nuclei (Extended data Fig.2e, lower panel,  
117 magnified view). Consistently, this cell death phenotype did not translate into defective ISC  
118 numbers (Extended data Fig.2h, i). Therefore, impaired midgut regeneration following the  
119 hypoxia or TTC ablation regime used in our study is unlikely to be secondary to ISC loss.  
120 Alternatively, differences in the regenerative response of hypoxic versus *dSRF<sup>ts</sup>>bax* midguts  
121 could be explained by the contribution of angiocrine factors to ISC proliferation, in addition to  
122 oxygen availability. Dpp/BMP ligand has been identified as an angiocrine factor in the adult  
123 midgut<sup>15</sup>. However, its action inhibits rather than induces ISC proliferation<sup>15</sup>. Therefore, a  
124 potential role of Dpp cannot directly explain our results (see also Discussion).

125         Given that tracheal remodelling and ISC proliferation show almost the exact same  
126 dynamics (Fig.1l, m and Extended data Fig. 1 h, i), it is unclear whether these events are part  
127 of a feedforward mechanism or if one precedes the other. To address this, we assessed  
128 tracheal remodelling following damage while blocking ISC proliferation by overexpressing  
129 *UAS-myc RNAi (myc<sup>-IR</sup>)*<sup>31</sup> using the stem/progenitor driver *escargot-GAL4 (esg<sup>ts</sup>>myc<sup>-IR</sup>)*  
130 (Fig.2e-g). As we needed to use the *GAL4/UAS* system to genetically manipulate gut cells,  
131 we established a scoring method for assessing tracheal coverage through the use of light  
132 microscopy, which was validated against our confocal microscopy tracheal quantification  
133 approach (Extended Data Fig.3a-c). Gut-associated trachea remodelled normally in  
134 *esg<sup>ts</sup>>myc<sup>-IR</sup>* midguts following *Pe* damage, in spite of the almost complete absence of ISC  
135 proliferation (Fig.2e-g). Therefore, TTC remodelling precedes midgut ISCs proliferation  
136 following damage. We hypothesised that signals activated by damage upstream of ISC  
137 proliferation might induce gut-tracheal remodelling.

138

139 **Gut-derived ROS initiates tracheal remodelling through activation of HIF-1 $\alpha$ /FGFR**  
140 **signaling in TTCs**

141 Pathogen-induced intestinal damage triggers a strong oxidative burst and the  
142 production of reactive oxygen species (ROS) from the intestinal epithelium<sup>32, 33</sup>. We therefore  
143 tested whether ROS could trigger tracheal remodelling in the regenerating intestine. Feeding  
144 animals with the antioxidant N-acetyl cysteine (NAC) or genetically blocking ROS production  
145 in ECs by overexpressing the enzyme *catalase*<sup>32</sup> (*NP1<sup>ts</sup>>catalase*) significantly impaired  
146 damage-induced tracheal remodelling (Fig.2h, i and Extended data Fig.3d, e) in addition to  
147 the expected reduction in regenerative ISC proliferation (Fig. 2j and Extended data Fig.3f)<sup>32</sup>.  
148 Conversely, driving adult intestinal epithelial cell death through *bax* overexpression in ECs  
149 (*NP1<sup>ts</sup>>bax*) was sufficient to induce TTC remodelling and ISC proliferation (Extended data  
150 Fig.3g-i). Therefore, intestinal epithelial damage and ROS induce remodelling of gut  
151 associated trachea, which is in turn necessary to drive ISC proliferation during intestinal  
152 regeneration.

153 Exogenous H<sub>2</sub>O<sub>2</sub> can stabilize HIF-1 $\alpha$  —a key conserved driver of hypoxia-induced  
154 tracheal/vascular remodelling<sup>9, 34, 35</sup>— in normoxia<sup>36</sup>. The Sima/HIF-1 $\alpha$  activity reporter *ldh-*  
155 *lacZ* was upregulated in gut-associated TTCs following midgut damage and in an ROS  
156 dependent manner (Fig.2k-m). Furthermore, midguts from *sima*<sup>-/-</sup> whole mutant animals or  
157 upon adult specific *sima* knockdown within TTCs (*dSRF<sup>ts</sup>>sima<sup>-IR</sup>*) showed significantly  
158 impaired tracheal remodelling and ISC proliferation following damage (Fig.3a-f).

159 The *Drosophila* fibroblast growth factor receptor (FGFR), Breathless (Btl), is a well-  
160 known transcriptional target of HIF-1 $\alpha$  during tracheal development and oxygen-driven  
161 tracheal remodelling<sup>19, 37</sup>. Consistently, a reporter of *breathless* (*btl*) expression (*btl-lacZ*)  
162 showed gene upregulation in TTCs following intestinal damage, which was abrogated by NAC  
163 (Fig.3g-i). TTC knockdown of *btl* (*dSRF<sup>ts</sup>>btl<sup>-IR</sup>*) inhibited tracheal remodelling and ISC  
164 proliferation following damage (Fig.3j-l), without evidence of cell death or ISC loss (Extended  
165 data Fig.2e, g-i). Therefore, ROS-dependent activation of HIF-1 $\alpha$ /FGFR signaling within TTCs  
166 following gut damage induces tracheal remodelling and regenerative ISC proliferation in the

167 adult midgut. Consistently, expression of the HIF-1 $\alpha$ /FGFR target gene *blistered (bs)/dSRF*<sup>19</sup>,  
168 <sup>38</sup> was upregulated in damaged and hypoxic midguts (Extended data Fig.4a-e) and knocking  
169 down *bs* in adult TTCs (*dSRF<sup>ts</sup>>bs<sup>IR</sup>*) impaired tracheal remodelling and ISC proliferation  
170 following damage (Extended data Fig.4f-h).

171

## 172 **ROS-dependent bidirectional FGF/FGFR signaling drives stem cell proliferation and** 173 **TTC remodelling during intestinal regeneration**

174 During development or hypoxia, the *Drosophila* FGF-like ligand Branchless (Bnl) is  
175 upregulated in target tissues and signals paracrinally to its receptor FGFR/Breathless (Btl) in  
176 the trachea to induce their remodelling<sup>16, 19, 39</sup>. Consistently, we observed upregulation of a *bnl*  
177 reporter (*bnl-lacZ*) in ISCs/EBs and ECs following intestinal damage, which was impaired by  
178 NAC (Fig.4a-c). These results suggest that ROS induces Bnl activation within the intestinal  
179 epithelium following damage. Unexpectedly, using the same reporter, we observed that *bnl*  
180 was also upregulated in TTCs following intestinal damage, in an ROS dependent manner  
181 (Fig.4d-e). Expression of *bnl* in TTCs was confirmed by the use of an independent reporter  
182 (Extended data Fig.5a, b). Overexpressing *bnl* in adult TTCs (*dSRF<sup>ts</sup>>bnl*) was sufficient to  
183 induce ISC proliferation without TTC remodelling (Extended data Fig.5c, d).

184 We next assess the functional role of individual sources of FGF/Bnl in our system.  
185 Consistent with our reporter expression data (Fig.4a-e), knocking down *bnl* from either TTCs  
186 (*dSRF<sup>ts</sup>>bnl<sup>IR</sup>*), ISCs/EBs (*esg<sup>ts</sup>>bnl<sup>IR</sup>*) or ECs (*NP1<sup>ts</sup>>bnl<sup>IR</sup>*) restrained ISC proliferation  
187 following midgut damage but did not impair TTC remodelling (Fig.4f-h and Extended data  
188 Fig.5e-j). This is in line with the high sensitivity of the regenerative intestine to discrete  
189 fluctuations in individual signaling activity<sup>31, 40</sup>. Hence, small variations in Bnl levels, which are  
190 insufficient to affect tracheal remodelling are enough to impact ISC proliferation following  
191 damage. Instead, concomitant *bnl* knockdown from ECs and ISCs/EBs (*NP1>, esgts>bnl<sup>IR</sup>*)  
192 significantly impaired TTC remodelling and subsequent ISC proliferation (Fig.4i-k). Therefore,  
193 the combined action of gut-derived sources of Bnl, is necessary to induce tracheal remodelling  
194 following intestinal damage.

195           Given that multiple sources of Bnl—from the midgut and TTCs—can individually  
196 contribute to regenerative ISC proliferation independently of tracheal remodelling, we  
197 hypothesised this may be through a non-tracheal receptor. Consistently, knocking down *btl*  
198 from ISCs/EBs (*esg<sup>ts</sup>>btl-IR*) significantly impaired ISC proliferation upon damage without  
199 affecting TTC remodelling (Extended data Fig.6a-c). In the context of tracheal development,  
200 Bnl/Btl signals through the MAPK/ERK pathway<sup>5, 41</sup>, which is a key driver of ISC proliferation  
201 in the adult *Drosophila* midgut<sup>42-44</sup>. Knocking down *btl* from ISCs/EBs (*esg<sup>ts</sup>>btl<sup>IR</sup>*) impaired  
202 damage-induced MAPK/ERK activation in the midgut (Extended data Fig.6d, e), suggesting  
203 that activation of Btl in the midgut regulates regenerative ISC proliferation through MAPK/ERK  
204 signaling.

205

## 206 **Identification of novel TTC intrinsic mechanisms triggered during intestinal** 207 **regeneration**

208           We next used Targeted DamID (TaDa) for TTC *in vivo* profiling of RNA Pol II chromatin  
209 binding<sup>45</sup> in control (Sucrose) and *Pe* treated midguts (Fig.5a and Extended data Fig.7a).  
210 TaDa is particularly advantageous in our system due to inherent difficulties to efficiently  
211 separate tracheal tissue from the midgut. We identified 1747 and 1712 genes significantly  
212 bound by RNA Pol II in TTCs from control (Sucrose) and *Pe* infected midguts, respectively  
213 (Supplementary Table 1). Gene ontology (GO) analysis of areas with significant RNA Pol II  
214 binding in control midguts revealed enrichment in components of the tracheal system, and  
215 genes previously involved in epithelial tube morphogenesis and respiratory/tracheal system  
216 development (Fig.5b) (Supplementary Table 2 and 3). This validated the sensitivity of TaDa  
217 to reliably detect tracheal specific genes from combined gut and tracheal tissue samples.

218           Consistent with our reporter expression and functional data (Fig.4d-h), TaDa analysis  
219 identified *bnl/FGF* as a gene with significant RNA Pol II binding in *Pe* treated midguts only  
220 (Supplementary Table 1) (Extended Data Fig.7b). Unexpectedly, we were unable to detect  
221 significant RNA Pol II binding to *btl* in adult TTCs of *Pe* treated midguts (Supplementary Table  
222 1). This is counterintuitive given our gene expression and functional data on *btl* (Fig.3g-l).

223 Discrepancies between RNA pol II occupancy and mRNA transcript status are possible and  
224 could be due to pausing of the polymerase<sup>46</sup>, post-transcriptional mRNA regulation<sup>47</sup> or  
225 temporally dynamic RNA pol II binding (e.g during intestinal damage), which may not be  
226 captured by a single time point assessment.

227

## 228 **Imp/IGF2BP is a novel regulator of adult tracheal remodelling and intestinal** 229 **regeneration**

230 Interestingly, we noticed that, within the genes showing significant RNA pol II binding in TTCs  
231 of *Pe* treated midguts only (Supplementary Table 1), there were several genes associated  
232 with neuronal function (Fig.5c). Amongst them, was the highly conserved mRNA-binding  
233 protein Imp/IGF2BP (Fig.5d) (Supplementary Table 1), which regulates axonal remodelling in  
234 *Drosophila*<sup>48, 49</sup>. We confirmed upregulation of *Imp* transcription by qRT-PCR (Fig.5e) and Imp  
235 increase in TTCs through the use of a protein trap (Imp::GFP) (Fig.5f, h). NAC treatment  
236 showed that Imp upregulation in TTCs following intestinal damage depends on ROS  
237 production (Fig.5g, h). Importantly, adult specific knock down of *Imp* from TTCs (*dSRF<sup>ts</sup>>Imp<sup>-IR</sup>*  
238 <sup>*IR*</sup>) significantly impaired tracheal remodelling and ISC proliferation following midgut epithelial  
239 damage (Fig.5i-k). Next, we investigated two well-known post-transcriptional targets of Imp in  
240 our system: *chickadee/profilin*<sup>48</sup> and *myc*<sup>49</sup>. Functional experiments on the role of *chickadee*  
241 led to inconclusive results (data not shown). However, Myc was upregulated in TTCs of *Pe*  
242 treated midguts and this was abrogated by *Imp* knockdown (*dSRF<sup>ts</sup>>imp<sup>-IR</sup>*) (Fig.6a, b).  
243 Moreover, adult specific knockdown of *myc* within TTCs using RNAi<sup>31</sup> (*dSRF<sup>ts</sup>>imp<sup>-IR</sup>*),  
244 impaired tracheal remodelling and ISC proliferation following gut damage (Fig.6c-e).  
245 Altogether, these results establish Imp as a novel regulator of TTC remodelling and ISC  
246 proliferation during adult *Drosophila* midgut regeneration. This function of Imp is at least in  
247 part through tracheal intrinsic control of Myc.

248

## 249 **Trachealess downregulation in TTCs is necessary for adult tracheal remodelling and** 250 **damage induced ISC proliferation**

251 While our TaDa analysis revealed significant binding of RNA Pol II to *trachealess* (*trh*) in TTCs  
252 of Sucrose treated midguts (Supplementary Table 1 and 3), this was not the case in the  
253 damaged tissues (Fig.7a and Supplementary Table 1). This was surprising given that *trh* is  
254 known a master regulator of tracheal gene expression and it is present in all tracheal cells  
255 from the onset of embryonic development through adulthood<sup>50-52</sup>. Loss of *trh* during  
256 development impairs tracheal cell specification and tube morphogenesis<sup>51, 52</sup>. However, qRT-  
257 PCR confirmed downregulation of *trh* upon intestinal damage (Fig.7b). Antibody staining  
258 (Fig.7c, d) and a transgenic reporter (*trh-lacZ*) (Fig.7e, f) further demonstrated protein and  
259 gene downregulation in TTCs upon gut damage, respectively. Remarkably, *trh-lacZ* signal was  
260 significantly restored upon *Pe* and NAC co-treatment or 32 hrs after removal of the damaging  
261 agent (Fig.7e, f). This suggests that *trh* expression in adult TTCs is highly dynamic and its  
262 downregulation upon intestinal damage is dependent on ROS. Importantly, consistent with our  
263 gene and protein expression data, *trh* overexpression in adult TTCs (*dSRF<sup>ts</sup>>trh*) significantly  
264 impaired tracheal remodelling and ISC proliferation (Fig.7g-i), while *trh* knockdown  
265 (*dSRF<sup>ts</sup>>trh<sup>-IR</sup>*) potentiates TTC remodelling and ISC proliferation following midgut damage  
266 (Fig.7g-i). Altogether, these results suggest that ROS-induced *trh* downregulation in adult  
267 TTCs is necessary to allow gut associated TTC plasticity and robust regeneration of the  
268 intestine following damage.

269 Here, we reveal a novel inter-organ communication program in *Drosophila*, involving  
270 the adult tracheal system and the midgut, which drives reciprocal adaptation of both tissues  
271 to sustain a robust regenerative response of the intestine to injury (Fig.7j). Our results may  
272 reflect vasculature/stem cell interactions in the mammalian intestine and other self-renewing  
273 tissues.

274



275 **Discussion**

276 The vasculature represents a prominent component of the gut microenvironment.  
277 However, its functional role in adult intestinal homeostasis remains largely unknown. Here, we  
278 report the cellular and molecular underpinnings of a novel inter-organ communication program  
279 between the adult *Drosophila* midgut and its closely associated vasculature-like tracheal  
280 tissue, which is fundamental to drive the regenerative response of ISCs following epithelial  
281 tissue damage.

282 ROS are key initiators of TTC remodelling and ISC proliferation, following intestinal  
283 damage by pathogenic infection (Fig. 7j). While our observations show a conserved  
284 phenomenology of TTCs/vasculature changes upon diverse intestinal insults and across  
285 species, it is highly conceivable that damage and species-specific molecular responses exist  
286 and that signals other than or in addition to ROS influence tracheal/vascular adaptations to  
287 intestinal damage.

288 HIF-1 $\alpha$ /FGFR signaling drives tracheogenesis during development and in response to  
289 hypoxia following activation by FGF from target tissues<sup>9, 34, 35</sup>. As such, our findings suggest  
290 a repurposing of this developmental pathway during adult gut/tracheal crosstalk. However, the  
291 discovery of ROS-inducible angiocrine Bnl/FGF activating stem/progenitor cell FGFR  
292 signaling during adult intestinal regeneration is a novel finding from our study (Fig. 7j). FGF  
293 induces vascular endothelial cell differentiation in human intestinal organoids<sup>53</sup> and acts as an  
294 angiocrine factor in various tumour settings<sup>54</sup>. This highlights the great degree of conservation  
295 between the *Drosophila* and mammalian system and raises the possibility of a conserved  
296 angiocrine role of FGF ligands in mammalian intestinal regeneration.

297 The DPP/BMP ligand has been reported as an angiocrine factor required to restrain  
298 stem cell proliferation in the adult *Drosophila* midgut<sup>15</sup>. However, knocking down *dpp* in adult  
299 TTCs did not affect basal stem cell proliferation as reported upon global ligand downregulation  
300 in the adult trachea<sup>15</sup> (data not shown). Ligand compensation from main tracheal branches or



301 the intestinal epithelium<sup>55</sup> may explain discrepancies between our results and the published  
302 study.

303 In addition to the well-established role of oxygen, nutrition regulates TTC remodelling  
304 in the larval and adult *Drosophila* midgut<sup>10</sup>. In this context, a defined subset of enteric neurons  
305 influence TTC remodelling through the delivery of Insulin- and Vasoactive Intestinal Peptide-  
306 like neuropeptides<sup>10</sup>. Nutrient induced-tracheal remodelling involves activation of Insulin  
307 Receptor (InR) signaling within TTCs. We observed no requirement for InR or enteric neuronal  
308 activity in the plastic response of adult TTCs to intestinal damage (data not shown).  
309 Reciprocally, FGF/FGFR signaling does not appear to mediate nutrient dependent TTC  
310 remodelling<sup>10</sup>. These results suggest that molecular events driving tracheal tissue plasticity  
311 are diverse and highly dependent on the biological context and/or stimuli.

312 We identified two novel tracheal-intrinsic molecular mechanisms triggered in response  
313 to intestinal epithelial damage and necessary to induce TTC remodelling and ISC proliferation  
314 (Fig. 7j). One, involving upregulation of *Drosophila* IGF2 mRNA-binding protein (Imp) and its  
315 downstream target Myc (Fig. 7j). The other, requiring downregulation of the tracheal cell  
316 specification factor *trh* (Fig. 7j). Known functions of Imp had been restricted to the induction of  
317 neuronal remodelling and growth<sup>48, 49</sup>. Its mammalian orthologue, IGF2BP2, has been studied  
318 for its involvement in metabolic disease<sup>56</sup> and its potential role in the vasculature remains to  
319 be addressed. *Trh*, homologous to mammalian NPAS3<sup>57</sup>, has been exclusively known for its  
320 requirement in the specification of tracheal cells from undifferentiated progenitors in the  
321 developing embryo<sup>50-52</sup>. Here, we present the first report for a role of *Trh* in terminally  
322 differentiated adult tracheal cells, which involves its unexpected downregulation. Emerging  
323 evidence suggests that adult tissues and cells, such as the intestine and neurons, lose  
324 differentiation markers and acquire 'naïve' or 'foetal-like properties' during the process of  
325 tissue regeneration<sup>58-60</sup>. Our work suggests the exciting possibility that this may also be the  
326 case for the adult vasculature.

327           The vasculature is a largely uncharacterized component of the adult intestinal niche.  
328    Vascularization of *in vitro* organ culture systems has been notoriously difficult, representing a  
329    major roadblock in the field of tissue engineering. As such, our *in vivo* findings may be of broad  
330    interest and impact to the vascular and intestinal research fields.

331

332

333

334

335

336

337

338

339

340

341

342

343

344

345

346

347

348

349 **Methods**

350 **Fly stocks and rearing.** A complete list of fly lines and full genotypes used in this study can  
351 be found in Supplementary Tables 5 and 6. In experiments using the *GAL4/GAL80<sup>ts</sup>* system,  
352 flies were crossed, F1 progenies reared, and adults aged for 5 days after eclosion at 18°C.  
353 Animals were then transferred to 29°C for 5-7 days to allow activation of most transgenes prior  
354 to phenotypic analysis. The exception was *bax*, which was overexpressed for only 3 days. If  
355 not carrying temperature sensitive transgenes, crosses and offspring were kept at 25°C.  
356 Overall, experimental animals were used 10-12 days following adult eclosion. Animals for  
357 experiments were maintained in food vials at low densities (10-15 flies per vial) and were  
358 transferred to fresh food every 2 days. Only adult posterior midguts from mated females were  
359 analysed in this study.

360

361 **Damage induced intestinal regeneration.** Oral administration of *Pe*, Bleomycin or DSS was  
362 performed as previously described<sup>21, 25, 61</sup> with minor modifications. Briefly, 10 day-old females  
363 of the desired genotypes were starved in empty vials for 2hrs followed by feeding with a 5%  
364 sucrose solution only (Sucrose), or Sucrose containing either *Pe* at OD 100, 25µg/ml  
365 Bleomycin (Sigma-Aldrich, Cat#B2434), or 3% DSS (Sigma-Aldrich, Cat#42867) applied on  
366 filter paper discs (Whatman). *Pe* infection was carried out for 16hrs, Bleomycin feeding was  
367 done for 1-day and DSS feeding lasted for 2-days, with fresh media applied each day.

368 **NAC treatment.** Flies were placed in empty vials with a filter paper soaked with a 5% sucrose  
369 solution containing 20mM NAC (Sigma-Aldrich, Cat#A7250) for 24 hrs. Animals were then fed  
370 with either 5% sucrose + NAC or 5% sucrose + NAC + *Pe* (OD 100) for an additional period  
371 of 24 hrs.

372

373 **Mouse intestinal regeneration and IHC.** *C57BL/6* mice were subject to whole body 10 Gy  
374 gamma-irradiation and the intestines were analysed 72 hrs post-irradiation, which represents  
375 the proliferative phase of the regenerative response to damage in the mouse small intestine<sup>28</sup>.

376 Small intestines were isolated and flushed with tap water. 10× 1cm portions of small intestine  
377 were bound together with surgical tape and fixed in 4% neutral buffered formalin. Intestines  
378 from 3 mice per condition were used. 4 μm sections of formalin–fixed paraffin–embedded  
379 (FFPE) tissues were cut, mounted onto adhesive slides and incubated at 60°C overnight. Prior  
380 to staining, sections were dewaxed for 5 minutes in xylene followed by rehydration through  
381 decreasing concentrations of alcohol and final washing with H<sub>2</sub>O for 5 minutes. FFPE sections  
382 underwent heat–induced epitope retrieval in a Dako pre-treatment module. Sections were  
383 heated in Target Retrieval Solution High pH (Dako, K8004) for 20 minutes at 97°C before  
384 cooling to 65°C. Slides were removed and washed in Tris Buffered Saline with Tween (TbT)  
385 (Dako, K8000) and loaded onto a Dako autostainer link48 platform where they were stained  
386 with anti-CD31 antibody 1:75 (Abcam, ab28364) following standard IHC procedures. All  
387 animal work has been approved by a University of Glasgow internal ethics committee and  
388 performed in accordance with institutional guidelines under personal and project licenses  
389 granted by the UK Home Office to J.B.C (PPL PCD3046BA).

390

#### 391 **Single terminal tracheal cell clones.**

392 To generate single cell clones of terminal tracheal cells, parental lines were allowed to mate  
393 for 2-3 days, after which adults were moved into new vials and F1 progenies were heat  
394 shocked in a water bath for 1 hr at 37°C. Adults of the correct genotype, emerging from the  
395 heat shocked animals, were selected and aged at 25°C for 10 days followed by feeding with  
396 Sucrose (control) or *Pe* for 16 hrs to cause intestinal damage and induce regeneration.  
397 Tissues were then dissected and processed for immunofluorescence staining and confocal  
398 imaging.

399

400 **Hypoxia treatment.** Adult flies were aged at 25°C or 29°C in 21% O<sub>2</sub> (Normoxia) at a density  
401 of 15-20 flies per vial. Then, animals were transferred overnight to 3% O<sub>2</sub> (Hypoxia) in a  
402 Whitley Scientific H35 hypoxystation incubator.

403 ***Drosophila* immunohistochemistry.** Immunohistochemistry was carried out as described  
404 previously<sup>31</sup>. The following antibodies were used: chicken anti-GFP 1:200 (Abcam, ab13970),  
405 mouse anti-PH3 1:100 (Cell Signaling, 9706), rabbit anti-Dcp1 1:100 (Cell Signaling, #9578S),  
406 rabbit anti- $\beta$ gal 1:1000 (MP Biochemicals #559761), rabbit anti-DsRed 1:1000 (Clontech,  
407 #632496), mouse anti-Arm 1:3 (Hybridoma Bank, N2 7A1), mouse anti-Dlg 1:100 (Hybridoma  
408 Bank, 4F3), rabbit anti-p-Erk 1:100 (Cell Signaling, #9101), guinea pig anti-Myc 1:100 (gift  
409 from Gines Morata) and rabbit anti-Trh 1:100 (gift from M. Llimargas). Chitin Binding Protein  
410 (CBP 1:100; gift from M. Llimargas) was used to visualise all tracheal tissue. Alexa Fluor 488,  
411 546 and 647 (Invitrogen) were used as secondary antibodies labels at 1:200 and 1:100  
412 respectively. Guts were mounted in Vectashield anti-fade mounting medium for fluorescence  
413 with DAPI (Vector Laboratories, Inc) to visualize all nuclei.

414

#### 415 **Image acquisition.**

416 Transmission Electron Microscopy. Guts were dissected under Schneider's insect medium  
417 and were subsequently fixed in 2.5% glutaraldehyde in 0.1 M cacodylate buffer (pH 7.4) for  
418 1hr at room temperature. Samples were rinsed repeatedly in 0.1M sodium cacodylate buffer,  
419 before fixation treatment in 1% Osmium Tetroxide/buffer for 1hr, followed by washing with  
420 dH<sub>2</sub>O for 30mins. Samples were then stained in 0.5% Uranyl Acetate/dH<sub>2</sub>O for 1hr (in the dark)  
421 and dehydrated by incubation in a graded series of Ethanol. Samples were subject to three  
422 subsequent incubations in Propylene Oxide followed by Epon 812 resin/Propylene Oxide  
423 (50:50) mix and left on a rotator overnight, followed by several incubations in pure Epon resin.  
424 Samples were then embedded into blocks and oven incubated at 60°C for 48hrs. Ultrathin  
425 sections (50-70nm thickness) were cut using a Leica Ultracut UCT. The sections produced  
426 were collected on Formvar coated 100 mesh copper grids and subsequently contrast stained  
427 in 2% Methanolic Uranyl Acetate for 5mins followed by Reynolds Lead Citrate for 5mins. Gut  
428 samples were viewed using a JEOL 1200 EX TEM and Images captured using a Cantega 2K  
429 x 2K camera and Olympus ITEM Software.

430 Confocal microscopy (Zeiss LSM 780). Each image represents half-volume of the full posterior  
431 midgut (area comprised between hindgut and Copper Cell Region) and were acquired with  
432 20x, 40x or 63x lenses using identical acquisition conditions for all samples from a given  
433 experiment. Images represent maximal intensity projection of a stable number of Z-Stacks and  
434 were processed with ImageJ and Carl Zeiss Zen 3.0 to adjust brightness and contrast.

435 Light microscopy (Axio observer Zeiss). Adult guts were dissected in PBS, mounted in 100%  
436 glycerol and imaged immediately. Up to three pictures per posterior midgut were taken to  
437 cover most of the area. Images were taken at their most apical plane to best detect TTCs with  
438 a 20x lens. Images from mouse intestinal samples (Fig. 1n) were acquired under a 20x lens  
439 using this microscope and were processed with ImageJ.

440

#### 441 **Quantifications in the adult posterior midgut.**

442 Quantification of ISC proliferation. Antibodies against Phosphorylated Histone H3 (PH3) were  
443 used to detect ISC proliferation in the adult midgut. The total number of PH3<sup>+</sup>ve cells per  
444 posterior midgut was quantified manually upon visual inspection using an Olympus BX51  
445 microscope. The number of midguts analysed (n) for each experiment are indicated in the  
446 figures.

447 Quantification of tracheal coverage from immunofluorescence images. Unless otherwise  
448 noted, confocal images of *dSRF>GFP* expressing midguts were used and tracheal values  
449 provided were obtained from quantification of tile scan images of the entire R4-R5 posterior  
450 midgut regions, acquired with a 20x lens. Values of tracheal coverage represent pixel per area  
451 and were obtained from maximum intensity Z-projections. Pictures were individually  
452 processed on ImageJ as follows: 1) maximum intensity projection from Z stacks were  
453 produced; 2) area of interest was cropped to eliminate Malpighian tubules, hindgut and copper  
454 cell region; 3) “threshold” was adjusted to ensure the detection of most of terminal tracheal  
455 branches; 4) function “skeletonize” was applied to generate a skeleton of the tracheal network;

456 5) maximum intensity of this skeleton was measured (Extended data Fig.1a). The number of  
457 posterior midguts analysed (n) for each experiment are indicated in the figures.

458 Quantification of tracheal branching form light-microscopy images. Acquired images were  
459 blindly scored using a 1 to 5 scoring system (Extended Data Fig.3a, c). The custom ImageJ  
460 macro used for blind tracheal scoring is available at "[Blind\\_scoring.ijm](#)". Number of midguts  
461 analysed (n) for each experiment are indicated in the figures.

462 Quantification of total branches per TTC and TTC ramifications. Maximum intensity projections  
463 from confocal Z stacks were used. The number of primary, secondary and tertiary branches  
464 derived from individual TTCs was assessed (Fig.1i). Due to the intrinsic complexity of the  
465 tracheal, it is difficult to unambiguously assign cellular extensions/branches to a single TTC.  
466 To circumvent this issue, we counted tracheal branches starting from a TTC body and defined  
467 the end of a TTC extension when it touched the body of another TTC. Additionally, the  
468 generation of single TTC clones allowed us to unambiguously quantify the total number of  
469 branches from individual TTC, which we did manually (Fig.1f, h). These two approaches led  
470 to same outcome. Number of TTC (n) and midguts analysed for each condition are indicated  
471 in the corresponding figures and figure legends.

472 Quantification of total tracheal length. We used the plugin "NeuronJ" from ImageJ to quantify  
473 the total length of all branches emerging from a TTC (Fig.1k). Number of TTC (n) and midguts  
474 analysed for each condition are indicated in the corresponding figures and figure legends.

475 Quantification of TTC nuclei. Confocal images of posterior midguts from animals expressing  
476 *dSRF<sup>ts</sup>>RedStinger* to label TTC nuclei were used. The custom ImageJ macro used for  
477 quantifying the number of TTC nuclei is available at "[dSrf\\_pH3\\_overlap\\_for\\_Jessica.ijm](#)". This  
478 macro was also used to quantify the number of TTC nuclei positive for PH3<sup>+</sup> staining  
479 (Extended data Fig.1g). Number of midguts analysed (n) for each condition is indicated in the  
480 corresponding figure and figure legend.

481 Quantification of posterior midgut area. Midgut tissue was visualized by DAPI staining and the  
482 posterior midgut area (length x width) was measured with ImageJ (Extended Data Fig.1c, d).  
483 Number of midguts analysed (n) for each condition is indicated in the corresponding figure  
484 and figure legend.

485 Quantification of lacZ reporters. Antibodies against  $\beta$ -galactosidase were used to detect  
486 *lactate dehydrogenase-*, *Delta-*, *breathless-*, *bs/dSRF-*, *branchless-* and *trachealess-lacZ*  
487 reporters. Pictures were taken with confocal microscopy and staining was quantified using  
488 ImageJ. For each gut quantified, the background staining signal was subtracted from the total  
489 signal of  $\beta$ -galactosidase detected in TTCs, ISCs/EBs or ECs. This value was then divided by  
490 the background signal to normalize the data. Number of cells (n) and midguts analysed for  
491 each condition are indicated in the corresponding figures and figure legends.

492 Quantification of cell death. Antibodies against Dcp1 were used to assess cell death in  
493 posterior midguts. Pictures were taken with confocal microscopy and Dcp1 staining intensity  
494 was measured relative to the surface of the gut area analysed. Number of midguts analysed  
495 (n) for each experiment are indicated corresponding in the figure and figure legend.

496 Quantification of pERK, Imp::GFP, Myc and Trachealess staining. Midguts stained with  
497 antibodies to detect these proteins included a methanol fixation step between the PFA fixation  
498 and PBST washing steps of the standard protocol, as described previously<sup>40</sup>. Images were  
499 acquired with confocal microscopy and staining was quantified using ImageJ. For each gut  
500 quantified, the background staining signal was subtracted from the total antibody signal within  
501 DAPI positive cells. This value was then divided by the background signal in order to normalize  
502 the data. The number of cells (n) and midguts analysed for each condition are indicated in the  
503 corresponding figures and figure legends.

504 **Statistical analysis.** Unless otherwise noted, in all figures: NS, not significant ( $p > 0.05$ ); \* $p <$   
505  $0.05$ , \*\* $p < 0.01$ , \*\*\* $p < 0.001$  \*\*\*\* $p < 0.0001$ . Prism 6 software (GraphPad) was used for  
506 statistical analyses. A two-tailed Student's t-test was conducted to compare two sample



507 groups. To test for significance in larger groups, two-way ANOVAs, corrected for multiple  
508 comparisons using Sidak's statistical hypothesis testing, respectively, were used. P values  
509 less than 0.05 were considered significant. Information on sample size and statistical tests  
510 used for each experiment are indicated in figure legends. Unless otherwise noted, experiments  
511 represent a minimum of 2 independent biological replicates. Please see reporting summary  
512 for further details.

513

#### 514 **qRT-PCR.**

515 Trizol (Invitrogen) was used to extract total RNA from 30 midguts per biological replicate.  
516 cDNA synthesis was performed using the High-Capacity cDNA Reverse Transcription Kit  
517 (Applied Biosystems). QuantiNova SYBR Green (Qiagen) was used for qPCR. Data were  
518 extracted and analysed using QuantStudio and Prism 6.0. Data from 5 biological replicates is  
519 presented as the mean fold change with standard error. Expression of target genes was  
520 measured and normalized to *gapdh1* or *act5c* using standard curves. Primer sequences can  
521 be found in Supplementary Table 4.

522

523 **Targeted DamID (TaDa), library preparation, sequencing and data analysis.** *dSRF-GAL4*;  
524 *tub-gal80<sup>ts</sup>* (*dSRF<sup>ts</sup>*) animals were crossed to *UAS-LT3-Dam* or *UAS-LT3-Dam-Pol II* animals  
525 at 18°C. F1 progeny were collected every 48 hrs and aged for a further 7 days at 18°C before  
526 transferring to 29°C to induce adult restricted Dam protein expression for 24 hrs. During the  
527 last 16 hrs at 29°C, flies were fed a Sucrose or Sucrose + *Pe* solution. 60 midguts per condition  
528 per biological replicate were dissected in cold PBS and stored at -80°C. Methylated DNA  
529 fragments were isolated and next generation sequencing libraries were prepared as described  
530 previously<sup>45</sup>. Sequencing data from TaDa experiments were processed using a previously  
531 described pipeline<sup>62</sup> and mapped to release 6.03 of the *Drosophila* genome. Transcribed  
532 genes were annotated for Pol II binding data using a custom Perl script<sup>46</sup> (available at  
533 [https://github.com/tonysouthall/Dam-RNA\\_POLII\\_analysis](https://github.com/tonysouthall/Dam-RNA_POLII_analysis)) and release 6.11 of the annotated  
534 *Drosophila* genome. Genes with significant RNA pol II binding were identified based on

535 meeting a threshold of 1% FDR and  $> 0.2 \log_2$  ratios. Briefly, a  $\log_2$  ratio of the Dam-RNA Pol  
536 II read counts over control Dam-only read counts is calculated after quantile normalisation<sup>62</sup>  
537 and if this ratio is higher than 0.2, then we would determine that this gene has significant RNA  
538 Pol II binding (Supplementary Table 1). Significance was assigned based on the signal from  
539 multiple GATC fragments and using a very stringent pipeline as a transcript had to have a  
540 false discovery ratio (FDR) of less than 1% in both replicates to be called significant.  
541 Gene Ontology (GO) term analysis was performed using the R package ClusterProfiler<sup>63</sup> to  
542 search for enriched GO terms (Supplementary Table 2). Three independent biological  
543 replicates were originally processed for each condition (Sucrose and *Pe*). However, after  
544 visual inspection of the sequencing tracks, one replicate from each condition was excluded  
545 from the analysis, due to poor DNA sample quality and unreliable sequencing data. Scattered  
546 plots showing the correlation between samples for each condition are provided (Extended data  
547 Fig.7a).

548

#### 549 **Data availability**

550 TaDa sequencing data is available through the University of Glasgow institutional repositories  
551 *DOI: 10.5525/gla.researchdata.994 (2020)*. The entire set of raw data supporting this study  
552 will be made accessible through the same repository prior to publication.

553

554

555

556

557 **Acknowledgements**

558 J.P. and J.B.C. are funded by a Wellcome Trust and Royal Society Sir Henry Dale Fellowship  
559 (Grant Number 104103/Z/14/Z; J.B.C.) and a Wellcome Trust Institutional Strategic Support  
560 Fund (ISSF) — Excellence and Innovation Catalyst Award to J.B.C. J.P. was partly funded by  
561 a BBSRC - Flexible Talent Mobility Account (FTMA) Award (BB/R506576/1). Y.Y. is supported  
562 by CRUK core funding to the CRUK Beatson Institute (A17196). T.D.S and G.N.A. were  
563 funded by a Wellcome Trust Investigator grant (104567; T.D.S.) and a BBSRC grant  
564 (BB/P017924/1; T.D.S. and G.N.A.)

565 We are thankful to Marta Llimargas, Markus Affolter, Irene Miguel-Aliaga, Andrea Brand,  
566 Cedric Polesello, Alessandro Scopelliti, Pablo Wappner, Ilan Davis, Florence Besse, Hugo  
567 Stoker, Gines Morata and Fisun Hamaratoglu Dion for generously sharing reagents and fly  
568 lines. We thank the Kyoto, Vienna and Bloomington Drosophila Stock Centres and the  
569 Drosophila Studies Hybridoma Bank for fly stocks and antibodies. We thank Colin Nixon  
570 (Beatson CRUK histology service) for IHC of mouse intestinal samples, Elaine McKenzie for  
571 help and training on the use of the hypoxia chamber, Margaret Mullin for assistance with TEM  
572 and David Strachan, John Halpin and Robert Insall (Beatson CRUK) for support with image  
573 quantification. We thank David McGuinness and Julie Galbraith (Glasgow Polyomics) for  
574 sequencing samples for TaDa and Rhoda Stefanatos for advice with RT-qPCRs. We thank  
575 Maté Naszai for help with the creation of custom ImageJ macros and Lynsey Carroll for  
576 providing mouse intestinal samples. We thank Jean-Philippe Parvy and multiple members of  
577 the Cordero lab for scientific discussion and advice on the project.

578 **Author contributions.**

579 J.P designed and carried out most experiments and analysed and interpreted the data. Y.Y.  
580 provided technical support throughout the study and perform RT-qPCRs. J.P. G.A, T.S and  
581 J.B.C. analysed the TaDa data. J.B.C conceived the project, designed experiments, analysed  
582 the data and supervised the study. J.P and J.B.C wrote the paper with contributions from the  
583 rest of the authors.

584

585

586 **References.**

- 587 1. Beumer, J. & Clevers, H. Regulation and plasticity of intestinal stem cells during homeostasis  
588 and regeneration. *Development* **143**, 3639-3649 (2016).
- 589 2. McCarthy, N., Kraiczy, J. & Shivdasani, R.A. Cellular and molecular architecture of the intestinal  
590 stem cell niche. *Nat Cell Biol* **22**, 1033-1041 (2020).
- 591 3. Hageman, J.H. *et al.* Intestinal Regeneration: Regulation by the Microenvironment. *Dev Cell*  
592 **54**, 435-446 (2020).
- 593 4. Ghabrial, A., Luschnig, S., Metzstein, M.M. & Krasnow, M.A. Branching morphogenesis of the  
594 *Drosophila* tracheal system. *Annu Rev Cell Dev Biol* **19**, 623-647 (2003).
- 595 5. Hayashi, S. & Kondo, T. Development and Function of the *Drosophila* Tracheal System.  
596 *Genetics* **209**, 367-380 (2018).
- 597 6. Eilken, H.M. & Adams, R.H. Dynamics of endothelial cell behavior in sprouting angiogenesis.  
598 *Curr Opin Cell Biol* **22**, 617-625 (2010).
- 599 7. Affolter, M. *et al.* Tube or not tube: remodeling epithelial tissues by branching morphogenesis.  
600 *Dev Cell* **4**, 11-18 (2003).
- 601 8. Cela, C. & Llimargas, M. *Egfr* is essential for maintaining epithelial integrity during tracheal  
602 remodelling in *Drosophila*. *Development* **133**, 3115-3125 (2006).
- 603 9. Centanin, L., Gorr, T.A. & Wappner, P. Tracheal remodelling in response to hypoxia. *J Insect*  
604 *Physiol* **56**, 447-454 (2010).
- 605 10. Linneweber, G.A. *et al.* Neuronal control of metabolism through nutrient-dependent  
606 modulation of tracheal branching. *Cell* **156**, 69-83 (2014).
- 607 11. Casali, A. & Batlle, E. Intestinal stem cells in mammals and *Drosophila*. *Cell Stem Cell* **4**, 124-  
608 127 (2009).
- 609 12. Micchelli, C.A. & Perrimon, N. Evidence that stem cells reside in the adult *Drosophila* midgut  
610 epithelium. *Nature* **439**, 475-479 (2006).

- 611 13. Ohlstein, B. & Spradling, A. The adult *Drosophila* posterior midgut is maintained by pluripotent  
612 stem cells. *Nature* **439**, 470-474 (2006).
- 613 14. Miguel-Aliaga, I., Jasper, H. & Lemaître, B. Anatomy and Physiology of the Digestive Tract of  
614 *Drosophila melanogaster*. *Genetics* **210**, 357-396 (2018).
- 615 15. Li, Z., Zhang, Y., Han, L., Shi, L. & Lin, X. Trachea-derived dpp controls adult midgut homeostasis  
616 in *Drosophila*. *Dev Cell* **24**, 133-143 (2013).
- 617 16. Sutherland, D., Samakovlis, C. & Krasnow, M.A. branchless encodes a *Drosophila* FGF homolog  
618 that controls tracheal cell migration and the pattern of branching. *Cell* **87**, 1091-1101 (1996).
- 619 17. Guillemin, K. *et al.* The pruned gene encodes the *Drosophila* serum response factor and  
620 regulates cytoplasmic outgrowth during terminal branching of the tracheal system.  
621 *Development* **122**, 1353-1362 (1996).
- 622 18. Gervais, L. & Casanova, J. The *Drosophila* homologue of SRF acts as a boosting mechanism to  
623 sustain FGF-induced terminal branching in the tracheal system. *Development* **138**, 1269-1274  
624 (2011).
- 625 19. Centanin, L. *et al.* Cell autonomy of HIF effects in *Drosophila*: tracheal cells sense hypoxia and  
626 induce terminal branch sprouting. *Dev Cell* **14**, 547-558 (2008).
- 627 20. Jiang, H. *et al.* Cytokine/Jak/Stat signaling mediates regeneration and homeostasis in the  
628 *Drosophila* midgut. *Cell* **137**, 1343-1355 (2009).
- 629 21. Buchon, N., Broderick, N.A., Poidevin, M., Pradervand, S. & Lemaître, B. *Drosophila* intestinal  
630 response to bacterial infection: activation of host defense and stem cell proliferation. *Cell Host*  
631 *Microbe* **5**, 200-211 (2009).
- 632 22. Buchon, N., Broderick, N.A., Chakrabarti, S. & Lemaître, B. Invasive and indigenous microbiota  
633 impact intestinal stem cell activity through multiple pathways in *Drosophila*. *Genes Dev* **23**,  
634 2333-2344 (2009).
- 635 23. Apidianakis, Y. & Rahme, L.G. *Drosophila melanogaster* as a model host for studying  
636 *Pseudomonas aeruginosa* infection. *Nat Protoc* **4**, 1285-1294 (2009).

- 637 24. Morel, F., Renoux, M., Lachaume, P. & Alziari, S. Bleomycin-induced double-strand breaks in  
638 mitochondrial DNA of *Drosophila* cells are repaired. *Mutat Res* **637**, 111-117 (2008).
- 639 25. Amcheslavsky, A., Jiang, J. & Ip, Y.T. Tissue damage-induced intestinal stem cell division in  
640 *Drosophila*. *Cell Stem Cell* **4**, 49-61 (2009).
- 641 26. Tian, A., Wang, B. & Jiang, J. Injury-stimulated and self-restrained BMP signaling dynamically  
642 regulates stem cell pool size during *Drosophila* midgut regeneration. *Proc Natl Acad Sci U S A*  
643 **114**, E2699-E2708 (2017).
- 644 27. Ren, F. *et al.* Hippo signaling regulates *Drosophila* intestine stem cell proliferation through  
645 multiple pathways. *Proc Natl Acad Sci U S A* **107**, 21064-21069 (2010).
- 646 28. Kim, C.K., Yang, V.W. & Bialkowska, A.B. The Role of Intestinal Stem Cells in Epithelial  
647 Regeneration Following Radiation-Induced Gut Injury. *Curr Stem Cell Rep* **3**, 320-332 (2017).
- 648 29. Chatterjee, M. & Ip, Y.T. Pathogenic stimulation of intestinal stem cell response in *Drosophila*.  
649 *J Cell Physiol* **220**, 664-671 (2009).
- 650 30. Lavista-Llanos, S. *et al.* Control of the hypoxic response in *Drosophila melanogaster* by the  
651 basic helix-loop-helix PAS protein similar. *Mol Cell Biol* **22**, 6842-6853 (2002).
- 652 31. Cordero, J.B., Stefanatos, R.K., Scopelliti, A., Vidal, M. & Sansom, O.J. Inducible progenitor-  
653 derived Wingless regulates adult midgut regeneration in *Drosophila*. *EMBO J* **31**, 3901-3917  
654 (2012).
- 655 32. Ha, E.M. *et al.* An antioxidant system required for host protection against gut infection in  
656 *Drosophila*. *Dev Cell* **8**, 125-132 (2005).
- 657 33. Hochmuth, C.E., Biteau, B., Bohmann, D. & Jasper, H. Redox regulation by Keap1 and Nrf2  
658 controls intestinal stem cell proliferation in *Drosophila*. *Cell Stem Cell* **8**, 188-199 (2011).
- 659 34. Rey, S. & Semenza, G.L. Hypoxia-inducible factor-1-dependent mechanisms of vascularization  
660 and vascular remodelling. *Cardiovasc Res* **86**, 236-242 (2010).

- 661 35. Bacon, N.C. *et al.* Regulation of the Drosophila bHLH-PAS protein Sima by hypoxia: functional  
662 evidence for homology with mammalian HIF-1 alpha. *Biochem Biophys Res Commun* **249**, 811-  
663 816 (1998).
- 664 36. Chandel, N.S. *et al.* Reactive oxygen species generated at mitochondrial complex III stabilize  
665 hypoxia-inducible factor-1alpha during hypoxia: a mechanism of O<sub>2</sub> sensing. *J Biol Chem* **275**,  
666 25130-25138 (2000).
- 667 37. Ohshiro, T. & Saigo, K. Transcriptional regulation of breathless FGF receptor gene by binding  
668 of TRACHEALESS/dARNT heterodimers to three central midline elements in Drosophila  
669 developing trachea. *Development* **124**, 3975-3986 (1997).
- 670 38. Horowitz, A. & Simons, M. Branching morphogenesis. *Circ Res* **103**, 784-795 (2008).
- 671 39. Du, L. *et al.* Unique patterns of organization and migration of FGF-expressing cells during  
672 Drosophila morphogenesis. *Dev Biol* **427**, 35-48 (2017).
- 673 40. Johansson, J. *et al.* RAL GTPases Drive Intestinal Stem Cell Function and Regeneration through  
674 Internalization of WNT Signalosomes. *Cell Stem Cell* **24**, 592-607 e597 (2019).
- 675 41. Muha, V. & Muller, H.A. Functions and Mechanisms of Fibroblast Growth Factor (FGF)  
676 Signalling in Drosophila melanogaster. *Int J Mol Sci* **14**, 5920-5937 (2013).
- 677 42. Biteau, B. & Jasper, H. EGF signaling regulates the proliferation of intestinal stem cells in  
678 Drosophila. *Development* **138**, 1045-1055 (2011).
- 679 43. Buchon, N., Broderick, N.A., Kuraishi, T. & Lemaitre, B. Drosophila EGFR pathway coordinates  
680 stem cell proliferation and gut remodeling following infection. *BMC Biol* **8**, 152 (2010).
- 681 44. Xu, N. *et al.* EGFR, Wingless and JAK/STAT signaling cooperatively maintain Drosophila  
682 intestinal stem cells. *Dev Biol* **354**, 31-43 (2011).
- 683 45. Marshall, O.J., Southall, T.D., Cheetham, S.W. & Brand, A.H. Cell-type-specific profiling of  
684 protein-DNA interactions without cell isolation using targeted DamID with next-generation  
685 sequencing. *Nat Protoc* **11**, 1586-1598 (2016).



- 686 46. Southall, T.D. *et al.* Cell-type-specific profiling of gene expression and chromatin binding  
687 without cell isolation: assaying RNA Pol II occupancy in neural stem cells. *Dev Cell* **26**, 101-112  
688 (2013).
- 689 47. Sandoval, J. *et al.* RNAPol-ChIP: a novel application of chromatin immunoprecipitation to the  
690 analysis of real-time gene transcription. *Nucleic Acids Res* **32**, e88 (2004).
- 691 48. Medioni, C., Ramialison, M., Ephrussi, A. & Besse, F. Imp promotes axonal remodeling by  
692 regulating profilin mRNA during brain development. *Curr Biol* **24**, 793-800 (2014).
- 693 49. Samuels, T.J., Jarvelin, A.I., Ish-Horowicz, D. & Davis, I. Imp/IGF2BP levels modulate individual  
694 neural stem cell growth and division through myc mRNA stability. *Elife* **9** (2020).
- 695 50. Chung, S., Chavez, C. & Andrew, D.J. Tracheless (Trh) regulates all tracheal genes during  
696 *Drosophila* embryogenesis. *Dev Biol* **360**, 160-172 (2011).
- 697 51. Isaac, D.D. & Andrew, D.J. Tubulogenesis in *Drosophila*: a requirement for the tracheless gene  
698 product. *Genes Dev* **10**, 103-117 (1996).
- 699 52. Wilk, R., Weizman, I. & Shilo, B.Z. tracheless encodes a bHLH-PAS protein that is an inducer  
700 of tracheal cell fates in *Drosophila*. *Genes Dev* **10**, 93-102 (1996).
- 701 53. Holloway, E.M. *et al.* Differentiation of Human Intestinal Organoids with Endogenous Vascular  
702 Endothelial Cells. *Dev Cell* **54**, 516-528 e517 (2020).
- 703 54. Pasquier, J. *et al.* Angiocrine endothelium: from physiology to cancer. *J Transl Med* **18**, 52  
704 (2020).
- 705 55. Zhou, J. *et al.* Dpp/Gbb signaling is required for normal intestinal regeneration during  
706 infection. *Dev Biol* **399**, 189-203 (2015).
- 707 56. Dai, N. *et al.* IGF2BP2/IMP2-Deficient mice resist obesity through enhanced translation of  
708 Ucp1 mRNA and Other mRNAs encoding mitochondrial proteins. *Cell Metab* **21**, 609-621  
709 (2015).

- 710 57. Zhou, S., Degan, S., Potts, E.N., Foster, W.M. & Sunday, M.E. NPAS3 is a trachealess homolog  
711 critical for lung development and homeostasis. *Proc Natl Acad Sci U S A* **106**, 11691-11696  
712 (2009).
- 713 58. Nusse, Y.M. *et al.* Parasitic helminths induce fetal-like reversion in the intestinal stem cell  
714 niche. *Nature* **559**, 109-113 (2018).
- 715 59. Poplawski, G.H.D. *et al.* Injured adult neurons regress to an embryonic transcriptional growth  
716 state. *Nature* **581**, 77-82 (2020).
- 717 60. Yui, S. *et al.* YAP/TAZ-Dependent Reprogramming of Colonic Epithelium Links ECM Remodeling  
718 to Tissue Regeneration. *Cell Stem Cell* **22**, 35-49 e37 (2018).
- 719 61. Myant, K.B. *et al.* ROS production and NF-kappaB activation triggered by RAC1 facilitate WNT-  
720 driven intestinal stem cell proliferation and colorectal cancer initiation. *Cell Stem Cell* **12**, 761-  
721 773 (2013).
- 722 62. Marshall, O.J. & Brand, A.H. damidseq\_pipeline: an automated pipeline for processing DamID  
723 sequencing datasets. *Bioinformatics* **31**, 3371-3373 (2015).
- 724 63. Yu, G., Wang, L.G., Han, Y. & He, Q.Y. clusterProfiler: an R package for comparing biological  
725 themes among gene clusters. *OMICS* **16**, 284-287 (2012).
- 726
- 727
- 728
- 729
- 730
- 731
- 732

733 **Fig. 1 – Adult tracheal plasticity following intestinal injury. a**, Confocal image of adult gut-  
734 associated terminal tracheal cells (TTCs) (green) in *Drosophila*. Scale bar: 500 $\mu$ m. **b, c**,  
735 Transmission electron microscopy of adult posterior midguts highlighting TTCs (green  
736 pseudo-coloured), enterocyte (EC) and intestinal stem cell (ISC) (red pseudo- coloured); VM:  
737 visceral muscle, Scale bars: 5 $\mu$ m. **d**, Confocal images of TTCs (green) and proliferating ISCs  
738 (PH3; red) in control (Sucrose) or damaged (*Pe*) midguts. Scale bars: 100 $\mu$ m. **e**, Quantification  
739 of tracheal coverage in midguts as in (d) or upon Bleomycin or DSS treatment. **f**,  
740 Representative confocal images of single TTC clones (green) from control (Suc) or *Pe*  
741 damaged posterior midguts and proliferating ISCs (PH3; red). Scale bar: 25 $\mu$ m. **g**,  
742 Quantification of the total number of branches per TTC clone in midguts as in (f). **h, (top)**,  
743 Quantification of total number of branches per TTC clone and nearby PH3<sup>+</sup> ISCs upon *Pe*  
744 infection. **(bottom)**, Representative confocal images of TTC clones (green) and proliferating  
745 ISCs (PH3; red) used for quantifications in top panel. Scale bars: 25 $\mu$ m. **f-h Statistics**:  
746 Student's t test; n= number of TTC clones from 7-9 posterior midguts. **i**, Confocal image of a  
747 TTC with pseudo-coloured primary (I<sup>R</sup>), secondary (II<sup>R</sup>) and tertiary (III<sup>R</sup>) branches. Scale bar:  
748 50 $\mu$ m. **j**, Quantification of number of branches per TTC from control or *Pe* infected posterior  
749 midguts. Statistics: Two-way ANOVA followed by Sidak's multiple comparisons test; n=  
750 number of TTCs from 6 midguts per condition. **k**, Quantification of total tracheal length per  
751 TTC. Statistics: Student's t test; n= number of TTCs from 6 midguts per condition. **l, m**,  
752 Quantification of tracheal coverage and PH3<sup>+</sup> cells in posterior midguts during 16 hrs of oral  
753 *Pe* infection followed by 32 hrs standard food incubation. Statistics: Student's t test to compare  
754 each timepoint of the damage and recovery stage against the 0 hrs and 16 hrs time points,  
755 respectively. n= number posterior midguts. **n**, Immunohistochemical analysis of control (non-  
756 irradiated) and regenerating (irradiated) mouse small intestines stained with anti-CD31 to  
757 visualize endothelial cells. Scale bars: 100 $\mu$ m (main figure); 50 $\mu$ m (close up view).  
758 Error bars:  $\pm$  SEM, \*p < 0.05, \*\*p < 0.01, \*\*\*p < 0.001 \*\*\*\*p < 0.0001.

759 **Fig. 2 – ROS induced tracheal remodelling is required for intestinal regeneration. a,**  
760 Confocal images of adult posterior midguts from control animals or upon adult-specific *bax*-  
761 driven TTC loss (green). Scale bar: 100 $\mu$ m. **b,** Quantification of tracheal coverage in posterior  
762 midguts as in (a). Statistics: Student's t test; n= number of posterior midguts. **c-d,**  
763 Quantification of PH3<sup>+</sup> ISCs in posterior midguts of the genotypes and conditions indicated. **e,**  
764 Representative brightfield images of adult posterior midguts from Sucrose fed and *Pe* infected  
765 animals without (control) or with adult-specific overexpression of *myc* RNAi in ISCs/EBs  
766 (*esg<sup>ts></sup>*). Scale bar: 50 $\mu$ m. **f, g,** Quantification of PH3<sup>+</sup> ISCs (f) and scored tracheal branching  
767 (g) in posterior midguts as in (e). **h,** Confocal images of control and *Pe* treated midguts in the  
768 presence or absence of the antioxidant NAC. Scale bar: 100 $\mu$ m. **i, j,** Quantification of tracheal  
769 coverage (i) and PH3<sup>+</sup> ISCs (j) in midguts as in (h). **c-j, Statistics:** Two-way ANOVA followed  
770 by Sidak's multiple comparisons test; n= number of posterior midguts. **k,l,** Confocal images of  
771 the HIF-1 $\alpha$ /Sima activity reporter *ldh-lacZ* (grey) in control or *Pe* infected adult posterior  
772 midguts without or with NAC (k, l, respectively). Scale bar: 50 $\mu$ m. **m,** Quantification of the  
773 average *ldh-lacZ* staining intensity in TTC within a defined region of posterior midguts as in  
774 (k, l). Statistics: Two-way ANOVA followed by Sidak's multiple comparisons test; n= number  
775 of TTC quantified from 9 to 10 posterior midguts per condition.

776 Error bars:  $\pm$ SEM; \*p < 0.05, \*\*p < 0.01, \*\*\*p < 0.001 \*\*\*\*p < 0.0001.

777 **Fig. 3 – Activation of HIF-1 $\alpha$ /FGFR signaling in TTCs is required for tracheal remodelling**  
778 **and intestinal regeneration following damage. a,** Confocal images of TTCs (green) in  
779 control (Sucrose) or *Pe* infected adult posterior midguts from wild type or *Sima*<sup>-/-</sup> whole mutant  
780 animals. Scale bar: 100 $\mu$ m. **b, c,** Quantification of tracheal coverage (b) and PH3<sup>+</sup> ISCs (c) in  
781 posterior midguts as in (a). **d,** Confocal images of control (Sucrose) or *Pe* infected adult  
782 posterior midguts from wild type animals or animals subject to adult-specific *sima* RNAi  
783 overexpression (*sima*<sup>-IR</sup>) within TTC (*dSRF<sup>ts></sup>>GFP*). Scale bar: 100 $\mu$ m. **e, f,** Quantification of  
784 tracheal coverage (e) and PH3<sup>+</sup> ISCs in posterior midguts as in (d). **a-f, Statistics:** Two-way  
785 ANOVA followed by Sidak's multiple comparisons test; n= number of posterior midguts. **g, h,**

786 Representative confocal images of *btl* reporter expression (*btl-lacZ*; magenta) in control or *Pe*  
787 infected adult posterior midguts without or with NAC (g, h, respectively). Dotted boxes  
788 represent a higher magnification of the area pointed with an arrow. Scale bars: 50 $\mu$ m (main  
789 figure); 20 $\mu$ m (close up view). **i**, Quantification of *btl-lacZ* staining intensity in TTC relative to  
790 background within a defined region of posterior midguts as in (g, h). Statistics: Two-way  
791 ANOVA followed by Sidak's multiple comparisons test; n= number of TTC from 9 to 10  
792 posterior midguts/condition. **j**, Confocal images of control and damaged adult posterior  
793 midguts from wild type animals or following *RNAi*-driven adult-specific *btl* knockdown (*btl<sup>IR</sup>*)  
794 within TTCs. Scale bar: 100 $\mu$ m. **k, l**, Quantification of tracheal coverage (k) and PH3<sup>+</sup> ISCs in  
795 posterior midguts as in (j). Statistics: Two-way ANOVA followed by Sidak's multiple  
796 comparisons test; n= number of posterior midguts.

797 Error bars:  $\pm$  SEM; \*p < 0.05, \*\*p < 0.01, \*\*\*p < 0.001 \*\*\*\*p < 0.0001.

798 **Fig. 4 – Bidirectional FGF/FGFR signaling between the midgut and TTCs drives tracheal**  
799 **remodelling and ISC proliferation during intestinal regeneration.** **a**, Representative  
800 confocal images of *FGF/bnl* reporter expression (*bnl-lacZ*; magenta) in control and *Pe* treated  
801 midguts in the presence or absence of NAC. Arrows point to reporter signal within ISCs/EBs  
802 (small nuclei and stained with anti-Armadillo (Arm); pseudo-coloured in green). Asterisks point  
803 to reporter signal within ECs (large nuclei and stained with anti-Discs large (Dlg); pseudo-  
804 coloured in green). Dotted areas outline ISCs/EBs or ECs pointed by arrows or asterisks,  
805 respectively. We noted consistent, unexplained downregulation of Dlg relative to Arm in  
806 Sucrose and NAC treated midguts. Scale bars: 40 $\mu$ m (main figure); 9 $\mu$ m (close up view). **b**,  
807 **c**, Quantification of *bnl-lacZ* staining within ISCs/EBs (b) and ECs (c) in posterior midguts as  
808 in (a). **d**, Representative confocal images of *FGF/bnl* reporter expression (*bnl-lacZ*; magenta)  
809 and TTCs (*dSRF>GFP*; green) in control (Sucrose) and regenerating (*Pe*) adult posterior  
810 midguts in the presence or absence of NAC. Arrows indicate reporter signal within TTCs.  
811 Dotted boxes show a magnified view of TTCs pointed by arrows. Scale bars: 40 $\mu$ m (main  
812 figure); 20 $\mu$ m (close up view). **e**, Quantification of *bnl-lacZ* staining within TTCs in posterior

813 midguts as in (d). **a-e**, Statistics: Two-way ANOVA followed by Sidak's multiple comparisons  
814 test; n= number of TTCs, ISC or ECs from 10-14 posterior midguts per condition. **f**, Confocal  
815 images of control and *Pe* treated adult posterior midguts from wild type animals or upon RNAi-  
816 driven adult-specific *bnl* knockdown (*bnl<sup>IR</sup>*) within TTCs. Scale bar: 50 $\mu$ m. **g, h**, Quantification  
817 of tracheal coverage (g) and PH3<sup>+</sup> ISCs (h) in midguts as in (f). **i**, Representative brightfield  
818 images of control (Sucrose) or regenerating (*Pe*) adult posterior midguts from wild type  
819 animals or upon RNAi-driven adult *bnl* knockdown (*bnl<sup>IR</sup>*) within ISCs/EBs and ECs (*NP1>*,  
820 *esg<sup>ts</sup>>GFP*). Scale bar: 50 $\mu$ m. **j, k**, Quantification of scored tracheal branching (j) and PH3<sup>+</sup>  
821 ISCs (k) in posterior midguts as in (i). **f-k**, Statistics: Two-way ANOVA followed by Sidak's  
822 multiple comparisons test; n= number of posterior midguts.

823 Error bars:  $\pm$  SEM; \*p < 0.05, \*\*p < 0.01, \*\*\*p < 0.001 \*\*\*\*p < 0.0001.

824 **Fig.5 – Imp is a novel regulator of adult tracheal remodelling and intestinal**  
825 **regeneration.** **a**, Schematic representation of targeted DamID approach used to profile RNA  
826 pol II binding in adult TTCs. **b**, Gene Ontology term analysis corresponding to genes with  
827 significant RNA pol II binding in adult TTCs from control midguts (Sucrose). **c**, List of genes  
828 associated to neuronal processes showing significant RNA pol II binding in TTCs following *Pe*  
829 treatment. Data is presented as the Log2 ratio of Dam-RNA Pol II/Dam (normalization control)  
830 read counts. **d**, Profile of RNA Pol II binding to *Imp* in TTCs from control (Suc) and  
831 regenerating (*Pe*) midguts. Boxes highlight areas with most prominent differences in RNA Pol  
832 II binding. **e**, qRT-PCR for *Imp* mRNA expression from whole adult midguts and associated  
833 tracheal tissue, in control (Sucrose) or *Pe* fed wild type animals. Statistics: Data are  
834 represented as mean  $\pm$  SEM of five biological replicates. Student's t test. **f, g**, Representative  
835 confocal images of *Imp* protein reporter *Imp::GFP* (green) and TTCs (*dSRF>Cherry*; magenta)  
836 in control (Sucrose) and regenerating (*Pe*) posterior midguts in the absence (f) or presence  
837 (g) of NAC. Arrows indicate reporter signal within TTCs. Dotted boxes show magnified views  
838 of TTCs pointed by arrows. Scale bars: 50 $\mu$ m (main figure); 12 $\mu$ m (close up view). **h**,  
839 Quantification of *Imp::GFP* staining intensity relative to background within TTCs in posterior

840 midguts as in (f) and (g). Statistics: Two-way ANOVA followed by Sidak's multiple comparisons  
841 test; n= number of TTC from 11-14 posterior midguts per condition. **i**, Representative confocal  
842 images of control (Sucrose) or *Pe* treated adult posterior midguts from wild type animals or  
843 upon RNAi-driven adult-specific *Imp* knockdown (*Imp<sup>-IR</sup>*) within TTCs (green). Scale bar:  
844 100 $\mu$ m. **j**, **k**, Quantification of tracheal coverage (j) and PH3<sup>+</sup> ISCs (k) in posterior midguts as  
845 in (i). Statistics: Two-way ANOVA followed by Sidak's multiple comparisons test; n= number  
846 of posterior midguts.

847 Error bars:  $\pm$  SEM; \*p < 0.05, \*\*p < 0.01, \*\*\*p < 0.001 \*\*\*\*p < 0.0001.

848 **Fig.6 – *Imp* dependent activation of *Myc* in TTCs is required for tracheal remodelling**  
849 **and intestinal regeneration.** **a**, Representative confocal images of *Myc* staining (magenta)  
850 and TTCs (*dSRF>GFP*; green) in control (Sucrose) or regenerating (*Pe*) midguts from wild  
851 type animals or upon RNAi-driven adult-specific *Imp* knockdown (*Imp<sup>-IR</sup>*) within TTCs. Arrows  
852 indicate *Myc* signal in TTCs. Dotted boxes show magnified views of TTCs pointed by arrows.  
853 Scale bars: 20 $\mu$ m (main figure); 10 $\mu$ m (close up view). **b**, Quantification of *Myc* staining  
854 intensity relative to background in TTCs from posterior midguts as in (a). Statistics: Two-way  
855 ANOVA followed by Sidak's multiple comparisons test; n= number of TTCs from 15-18  
856 posterior midguts per condition. **c**, Representative confocal images of control (Suc) or *Pe*  
857 treated adult posterior midguts from wild type animals or upon RNAi-driven adult-specific *myc*  
858 knockdown (*myc<sup>-IR</sup>*) within TTCs (green). Scale bar: 100 $\mu$ m. **d**, **e**, Quantification of tracheal  
859 coverage (d) and PH3<sup>+</sup> ISCs (e) in posterior midguts as in (c). Statistics: Two-way ANOVA  
860 followed by Sidak's multiple comparisons test; n= number of posterior midguts quantified.

861 Error bars:  $\pm$  SEM; \*p < 0.05, \*\*p < 0.01, \*\*\*p < 0.001 \*\*\*\*p < 0.0001.

862 **Fig.7 – *Trachealess* downregulation in TTCs is necessary for adult tracheal remodelling**  
863 **and damage induced ISC proliferation.** **a**, Profile of RNA Pol II binding to *trachealess* (*trh*)  
864 within TTCs of control (Suc) and regenerating (*Pe*) midguts. **b**, qRT-PCR for *trh* mRNA  
865 expression from whole adult midguts and associated tracheal tissue of control (Sucrose) or



866 *Pe* fed animals. Statistics: Data are represented as mean  $\pm$  SEM of five biological experimental  
867 replicates. Student's t test. **c**, Representative confocal images of Trh staining (red) and TTCs  
868 (*dSRF>GFP*; green) in control (Sucrose) or regenerating (*Pe*) midguts. Arrows indicate Trh  
869 signal within TTCs. Dotted boxes show magnified views of TTCs pointed by arrows. Scale  
870 bars: 20 $\mu$ m (main figure); 10 $\mu$ m (close up view). **d**, Quantification of Trh staining intensity  
871 relative to background within TTCs in posterior midguts as in (c). Statistics: Student's t test;  
872 n= number of TTC from 14 posterior midguts per condition. **e**, Representative confocal images  
873 of *trh* reporter expression (*trh-lacZ*; magenta) and TTCs (*dSRF>GFP*; green) in control  
874 (Sucrose) or *Pe* infected midguts without (Damage) or with NAC (Damage + NAC), and  
875 following incubation in normal food during 32 hrs, post-infection (Recovery). Arrows indicate  
876 *trh-lacZ* signal within TTCs. Dotted boxes show magnified views of TTCs pointed by arrows.  
877 Scale bars: 50 $\mu$ m (main figure); 20 $\mu$ m (close up view). **f**, Quantification of *trh-lacZ* staining  
878 intensity relative to background within TTCs of midguts as in (e). Statistics: Student's t test;  
879 n= number of TTCs from 12-21 posterior midguts per condition. **g**, Representative confocal  
880 images from control (Suc) or regenerating (*Pe*) adult posterior midguts from wild type animals  
881 or upon adult-specific *trh* overexpression (*trh*) or RNAi-driven knockdown (*trh<sup>-IR</sup>*) within TTCs  
882 (green). Scale bar: 100 $\mu$ m. **h**, **i**, Quantification of tracheal coverage (h) and PH3<sup>+</sup> ISCs (i) in  
883 posterior midguts as in (g). Statistics: Two-way ANOVA, followed by Sidak's multiple  
884 comparisons test; n= number of posterior midguts. **j**, Schematic representation of working  
885 model.

886 Error bars:  $\pm$ SEM; \*p < 0.05, \*\*p < 0.01, \*\*\*p < 0.001 \*\*\*\*p < 0.0001.

887

888 **Extended data Fig. 1 – Characterization and quantification of adult tracheal remodelling**  
889 **following intestinal damage. a, (top)**, Representative confocal image of adult posterior  
890 midgut and associated TTCs (green). **(bottom)**, illustration of the different steps followed for  
891 the quantification of gut tracheal coverage as explained in Methods. Scale bar: 100 $\mu$ m. Box in



892 top panel highlights the area shown in the bottom panels **b**, Representative confocal images  
893 of TTCs (green) from posterior midguts of control animals (Suc) or animals fed with Bleomycin  
894 or DSS. Scale bar: 50 $\mu$ m. **c**, Representative confocal images of control (Suc) or damaged  
895 (*Pe*) adult posterior midguts (shaded in brown). Scale bar: 100 $\mu$ m. **d**, **e**, Quantification of  
896 posterior midgut area (d) and ratio of tracheal coverage over adult posterior midgut area (e).  
897 **f**, Representative confocal images of TTCs (green) from control (Suc) or *Pe* damaged adult  
898 posterior midguts stained with anti-PH3 to label proliferating ISCs (red). Bottom panels  
899 represent orthogonal views of the midguts shown in top panels. Scale bar: 50 $\mu$ m. **g**,  
900 Quantification of individual or combined TTC nuclei and PH3<sup>+</sup> cells in control or *Pe* infected  
901 midguts. **c-g**, Statistics: Student's t test; n= number of posterior midguts; error bars  $\pm$ SEM.  
902 \*\*\*\*p< 0.0001. **h**, Confocal images of adult TTCs assessed at the indicated time points during  
903 and after intestinal damage. White lines trace individual TTCs. Scale bar: 50 $\mu$ m. **i**, Correlation  
904 graph between TTC coverage and ISC proliferation for each of the time points and conditions  
905 presented in (h). Statistics: Pearson's correlation coefficient (r)=0.9660 and 0.9962;  
906 \*\*p=0.0075 and 0.0038 in damage and recovery phases, respectively.

907 **Extended data Fig. 2 – Hypoxia or impaired TTC remodelling does not affect ISC**  
908 **survival.** **a**, Confocal images of TTCs (green) and the HIF-1 $\alpha$ /Sima activity reporter *ldh-lacZ*  
909 (grey) in adult posterior midguts from animals in normoxia (21% O<sub>2</sub>) or subjected to 24 hrs of  
910 hypoxia (3% O<sub>2</sub>). Dotted boxes show a magnified view of TTCs pointed by arrows. Scale bars:  
911 50 $\mu$ m (main figure); 20 $\mu$ m (close up view). **b**, Quantification of *ldh-lacZ* staining intensity within  
912 TTCs, relative to background, in midguts as in (a). Statistics: Student's t test; n= number of  
913 TTC from 9 posterior midguts per condition. **c**, Quantification of tracheal coverage in adult  
914 posterior midguts as in (a). Statistics: Student's t test; n= number of posterior midguts. **d**, **e**,  
915 Confocal images of adult posterior midguts stained with anti-Dcp1 (magenta) to visualize cell  
916 death in control animals; upon adult-specific *bax* overexpression in ECs (d); animals subjected  
917 to hypoxia or to the indicate genetic TTC disruptions (e). **d**, **e**, Upper panels (apical tissue  
918 views); lower panels (longitudinal sections showing intestinal tube lumen). Scale bar: 50 $\mu$ m.

919 The high level of Dcp1 staining in the lumen of midguts subject to *bax* overexpression in ECs  
920 (d) corresponds to many delaminating/dying cells. Dotted box in (e) shows a magnified view  
921 of an apoptotic EC pointed by arrow in main figure and identified by its large nuclei and Dcp1  
922 staining. Scale bars: 50 $\mu$ m (main figure); 20 $\mu$ m (close up view). **f, g**, Quantification of Dcp1  
923 staining in midguts as in (d, e). Statistics: Student's t test; n= number of posterior midguts; **h**,  
924 Confocal images of TTCs (green) and ISCs detected with a *Delta-lacZ* reporter (magenta) and  
925 anti-Armadillo (Arm) staining (grey) in midguts as in (e). Dotted boxes in middle panels indicate  
926 the magnified areas in the lower panels. Scale bars: 50 $\mu$ m (main figure); 20 $\mu$ m (close up view).  
927 **i**, Quantification of the number of *Delta-lacZ* positive cells in midguts as in (h). Statistics:  
928 Student's t test; n= number of posterior midguts.

929 Error bars:  $\pm$ SEM; \* $p < 0.05$ , \*\* $p < 0.01$ , \*\*\* $p < 0.001$  \*\*\*\* $p < 0.0001$ .

930 **Extended data Fig. 3 – Gut associated TTCs are responsive to local signals from the**  
931 **damaged intestinal epithelium. a**, Examples of tracheal branching levels assigned to each  
932 of the scores used for the quantification of tracheal coverage from light microscopy images.  
933 Scale bar: 50 $\mu$ m. **b, c (top panels)**, Quantification of tracheal branching from confocal (b) and  
934 brightfield images (c) of control (Suc) or *Pe* damaged posterior midguts. **b, c (bottom panels)**  
935 Representative confocal (b) or brightfield images (c) from midguts as in top panels. Scale bars:  
936 50 $\mu$ m. **d**, Representative brightfield images from control (Suc) or *Pe* damaged posterior  
937 midguts from wild type animals or upon adult-specific *catalase* overexpression within ECs.  
938 Scale bar: 50 $\mu$ m. **e, f**, Scoring of tracheal branching (e) and quantification of PH3<sup>+</sup> ISCs (f) in  
939 posterior midguts as in (d). Statistics: Two-way ANOVA followed by Sidak's multiple  
940 comparisons test; n= number of posterior midguts quantified. **g**, Representative brightfield  
941 images of posterior midgut from control animals or upon adult-specific overexpression of *bax*  
942 in ECs. Scale bar: 50 $\mu$ m. **h, i**, Quantification of tracheal branching (h) and PH3<sup>+</sup> ISCs (i) in  
943 posterior midguts as in (g). **b, c and g-i**, Statistics: Student's t test; n= number of posterior  
944 midguts.

945 Error bars:  $\pm$ SEM; \* $p < 0.05$ , \*\* $p < 0.01$ , \*\*\* $p < 0.001$  \*\*\*\* $p < 0.0001$ .

946 **Extended data Fig. 4 – *blistered/dSRF* expression is upregulated in adult TTCs following**  
947 **intestinal damage or hypoxia and it regulates damage induced TTC remodelling and**  
948 **ISC proliferation. a**, qRT-PCR for *blistered (bs)/dSRF* mRNA expression from adult midguts  
949 and associated tracheal tissue, in control (Sucrose) or *Pe* treated midguts. Statistics: Data are  
950 represented as mean  $\pm$  SEM of five biological replicates; Student's t test. **b**, Representative  
951 confocal images of *bs-lacZ* reporter expression (red) in control (Sucrose) and regenerating  
952 (*Pe*) adult posterior midguts stained with Chitin Binding Protein (CBP, green) to visualise all  
953 tracheal tissue. Dotted boxes show a magnified view of TTCs pointed by arrows. Scale bars:  
954 50 $\mu$ m (main figure); 20 $\mu$ m (close up view). **c**, Quantification of *bs-lacZ* staining intensity within  
955 TTCs in posterior midguts as in (b). **d**, Representative confocal images of *bs-lacZ* reporter  
956 expression (red) in adult posterior midguts from animals housed in normoxia (21% O<sub>2</sub>) or  
957 subjected to 16 hrs of hypoxia (3% O<sub>2</sub>) and stained with CBP (green). Dotted boxes show a  
958 magnified view of TTCs pointed by arrows. Scale bars: 50 $\mu$ m (main figure); 20 $\mu$ m (close up  
959 view). **e**, Quantification of *bs-lacZ* staining intensity within TTCs in posterior midguts as in (d).  
960 **b-e**, Statistics: Student's t test; n= number of TTC from 12-15 posterior midguts per condition.  
961 **f**, Confocal images of control (Sucrose) and damaged (*Pe*) adult posterior midguts from wild  
962 type animals or following *RNAi*-driven adult-specific *bs* knockdown (*bs<sup>-IR</sup>*) within TTCs. Scale  
963 bar: 100 $\mu$ m. **g, h**, Quantification of tracheal coverage (g) and PH3<sup>+</sup> ISCs in posterior midguts  
964 as in (f). Statistics: Two-way ANOVA followed by Sidak's multiple comparisons test; n=  
965 number of posterior midguts quantified.

966 Error bars:  $\pm$ SEM; \* $p < 0.05$ , \*\* $p < 0.01$ , \*\*\* $p < 0.001$  \*\*\*\* $p < 0.0001$ .

967 **Extended data Fig. 5 – Multiple sources of Bnl individually contribute to regenerative**  
968 **ISC proliferation in the adult *Drosophila* midgut, independently of tracheal remodelling.**  
969 **a**, Representative confocal images of *FGF/bnl* reporter expression *bnl>GFPnlacZ* (green) in  
970 control (Sucrose) and regenerating (*Pe*) adult posterior midguts stained with CBP (magenta)

971 to visualise all tracheal tissue and PH3 (magenta). Dotted boxes in left panels indicate the  
972 area magnified in the right panels. Scale bars: 100 $\mu$ m (main figure); 40 $\mu$ m (close up view). **b**,  
973 Quantification of *bnl*>*GFPnlacZ* staining intensity relative to background within TTCs in  
974 posterior midguts as in (a). Statistics: Student's t test; n= number of TTC from 12 posterior  
975 midguts per condition. **c, d** Quantification of tracheal coverage (c) and PH3<sup>+</sup> ISCs (d) from wild  
976 type animals or upon adult-specific *bnl* overexpression within TTCs. Statistics: Student's t test;  
977 n= number of posterior midguts. **e**, Representative brightfield images from control (Suc) or *Pe*  
978 damaged posterior midguts from wild type animals or following RNAi-driven adult-specific *bnl*  
979 knockdown (*bnl<sup>IR</sup>*) within ISCs/EBs. Scale bar: 50 $\mu$ m. **f, g**, Quantification of tracheal branching  
980 (f) and PH3<sup>+</sup> ISCs (g) in posterior midguts as in (e). **h**, Representative brightfield images from  
981 control (Suc) or *Pe* damaged posterior midguts from wild type animals or upon adult-specific  
982 *bnl* knockdown (*bnl<sup>IR</sup>*) within ECs. Scale bar: 50 $\mu$ m. **i, j**, Quantification of tracheal branching  
983 (i) and PH3<sup>+</sup> ISCs (j) in posterior midguts as in (h). **e-j**, Statistics: Two-way ANOVA followed  
984 by Sidak's multiple comparisons test; n= number of posterior midguts quantified.

985 Error bars:  $\pm$  SEM; \*p < 0.05, \*\*p < 0.01, \*\*\*p < 0.001 \*\*\*\*p < 0.0001.

986 **Extended data Fig. 6 – Individual sources of gut-derived Bnl are redundant for TTC**  
987 **remodelling but required for damage induced ISC proliferation.** **a**, Representative  
988 brightfield images of control (Sucrose) or regenerating (*Pe*) adult posterior midguts from wild  
989 type animals or upon RNAi-driven adult-specific *btl* knockdown (*btl<sup>IR</sup>*) within ISCs/EBs. Scale  
990 bar: 50 $\mu$ m. **b, c**, Quantification of tracheal branching (b) and PH3<sup>+</sup> ISCs (c) in posterior midguts  
991 as in (a). Statistics: Two-way ANOVA followed by Sidak's multiple comparisons test; n=  
992 number of posterior midguts. **d**, Representative confocal images of activated MAPK (pERK)  
993 staining (red), Arm (grey) and ISCs/EBs (*esg*>*GFP*, green) in control (Sucrose) or  
994 regenerating (*Pe*) adult posterior midguts from wild type animals or upon RNAi-driven adult-  
995 specific *btl* knockdown (*btl<sup>IR</sup>*) within ISCs/EBs. Dotted boxes show a magnified view of the  
996 ISCs/EBs pointed by arrows. Scale bars: 50 $\mu$ m (main figure); 40 $\mu$ m (close up view). **e**,  
997 Quantification of pERK staining intensity relative to background within ISCs/EBs in posterior

998 midguts as in (d). Statistics: Two-way ANOVA followed by Sidak's multiple comparisons test;  
999 n= number of ISCs/EBs from 11 posterior midguts per condition.

1000 Error bars:  $\pm$ SEM; \* $p < 0.05$ , \*\* $p < 0.01$ , \*\*\* $p < 0.001$  \*\*\*\* $p < 0.0001$ .

1001 **Extended data Fig. 7 – Genome wide RNA pol II binding profile within adult TTC by**  
1002 **targeted DamID (TaDa). a**, Scatterplots indicating correlation between TaDa replicates for  
1003 each of the conditions used in this study. Significant correlation is observed between replicates  
1004 of each condition. Each data point represents the average score for each gene (log<sub>2</sub> Dam-pol  
1005 II/ Dam-only). **b**, RNA Pol II binding profile to *bnl* in TTCs from control (Suc) and damaged  
1006 (*Pe*) adult midguts. Boxes highlight areas with most prominent differences in RNA Pol II  
1007 binding.

1008

1009

1010

1011



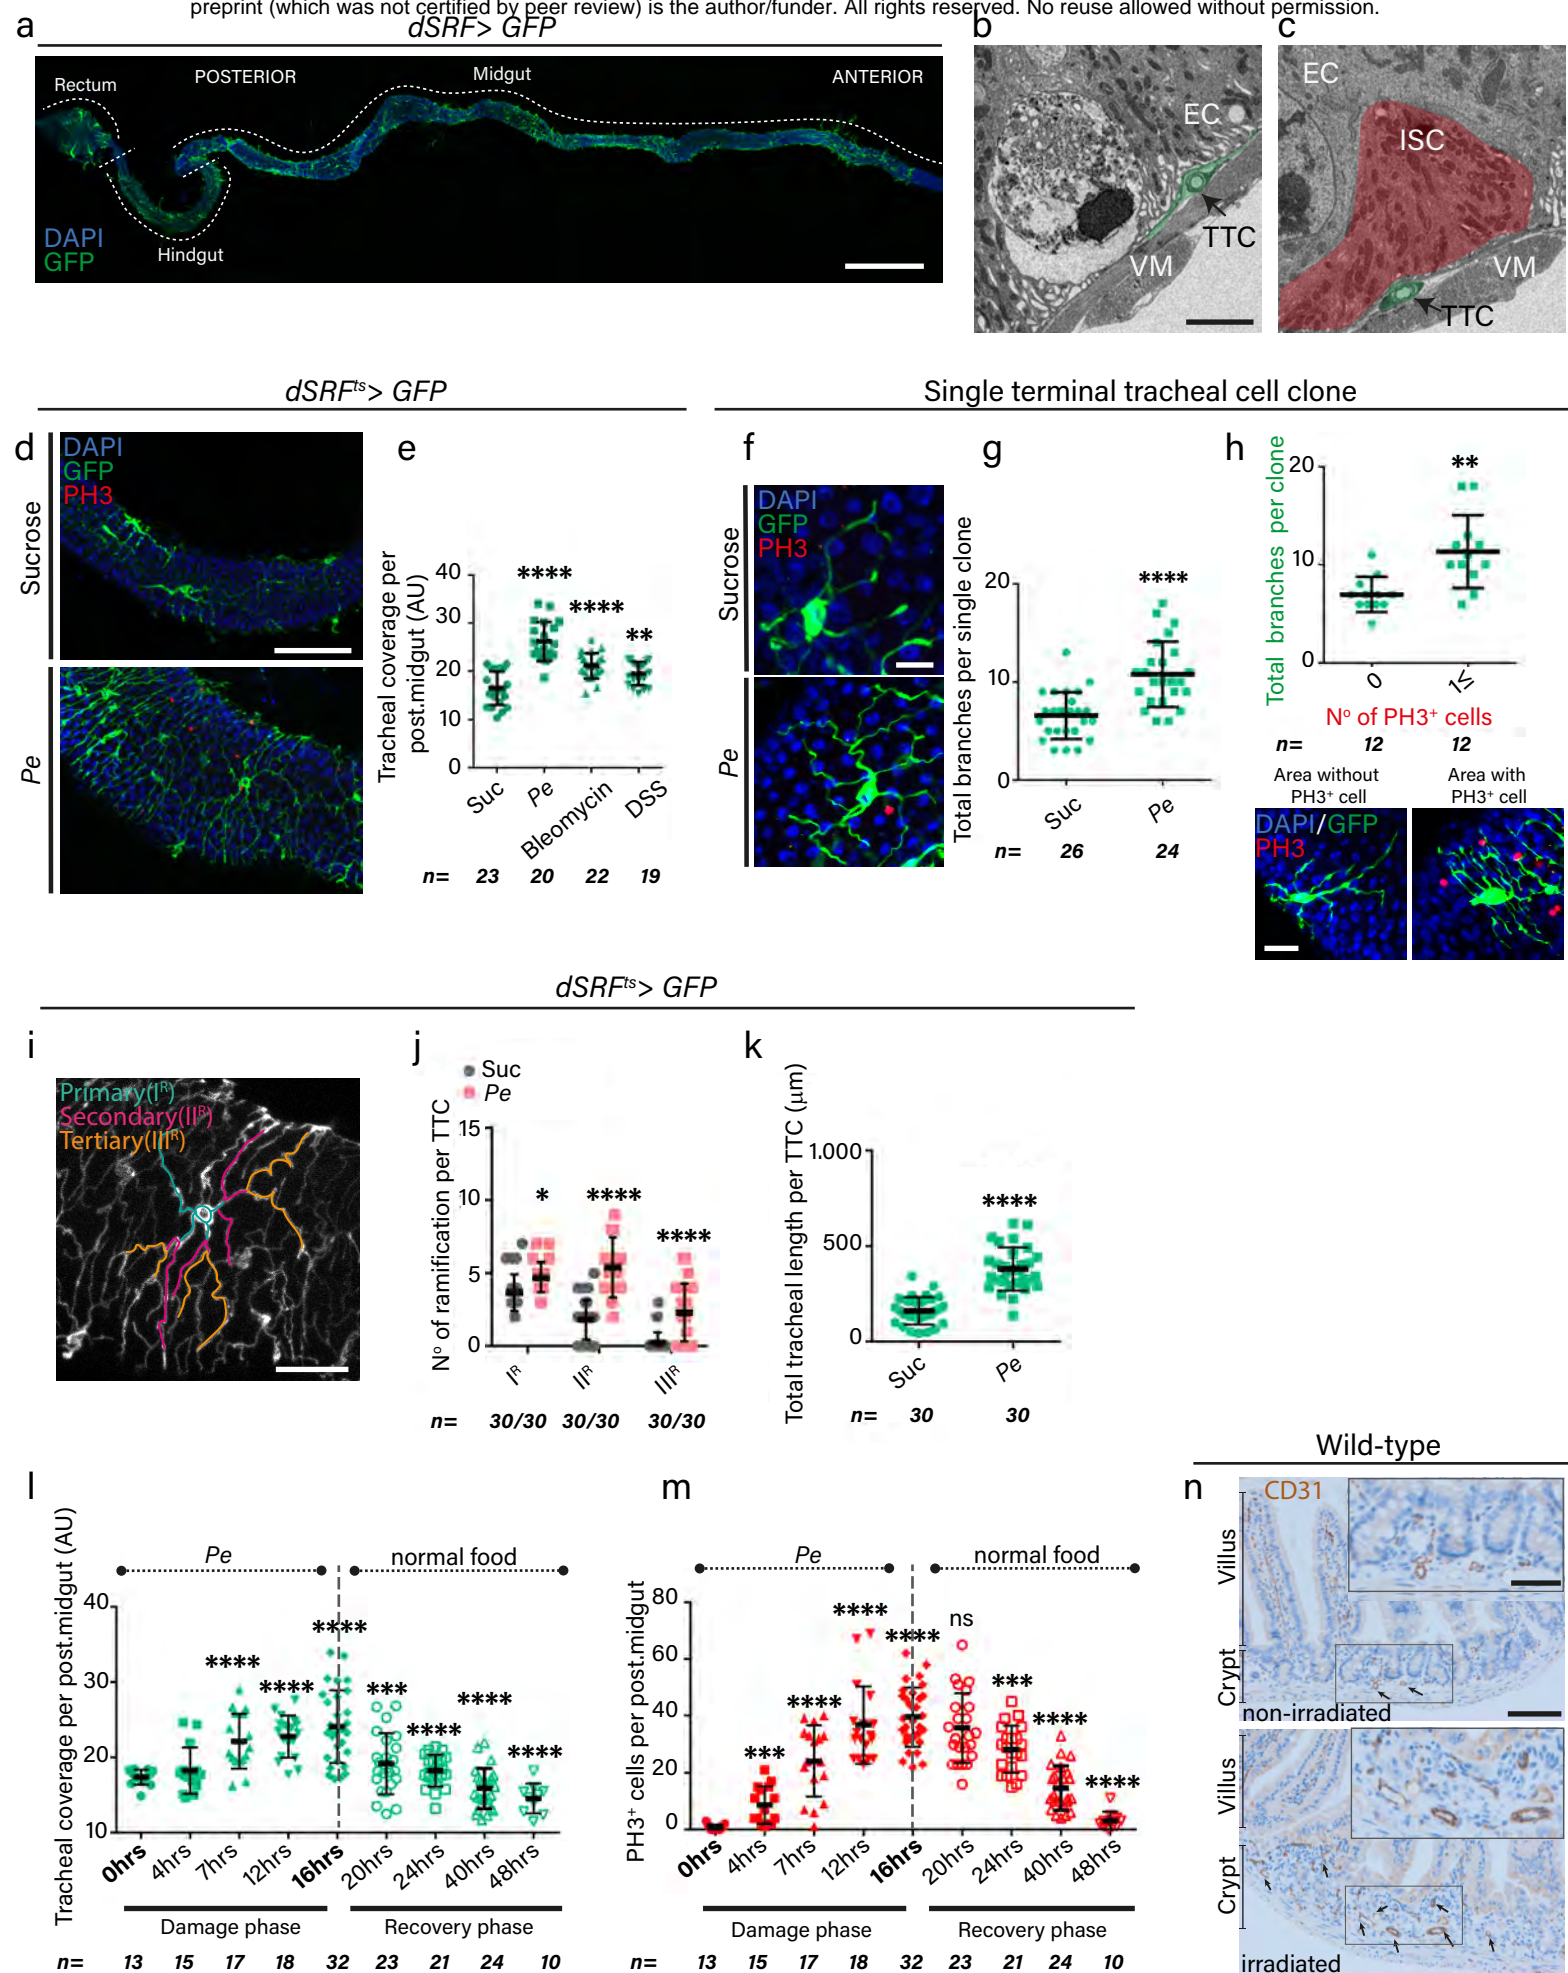

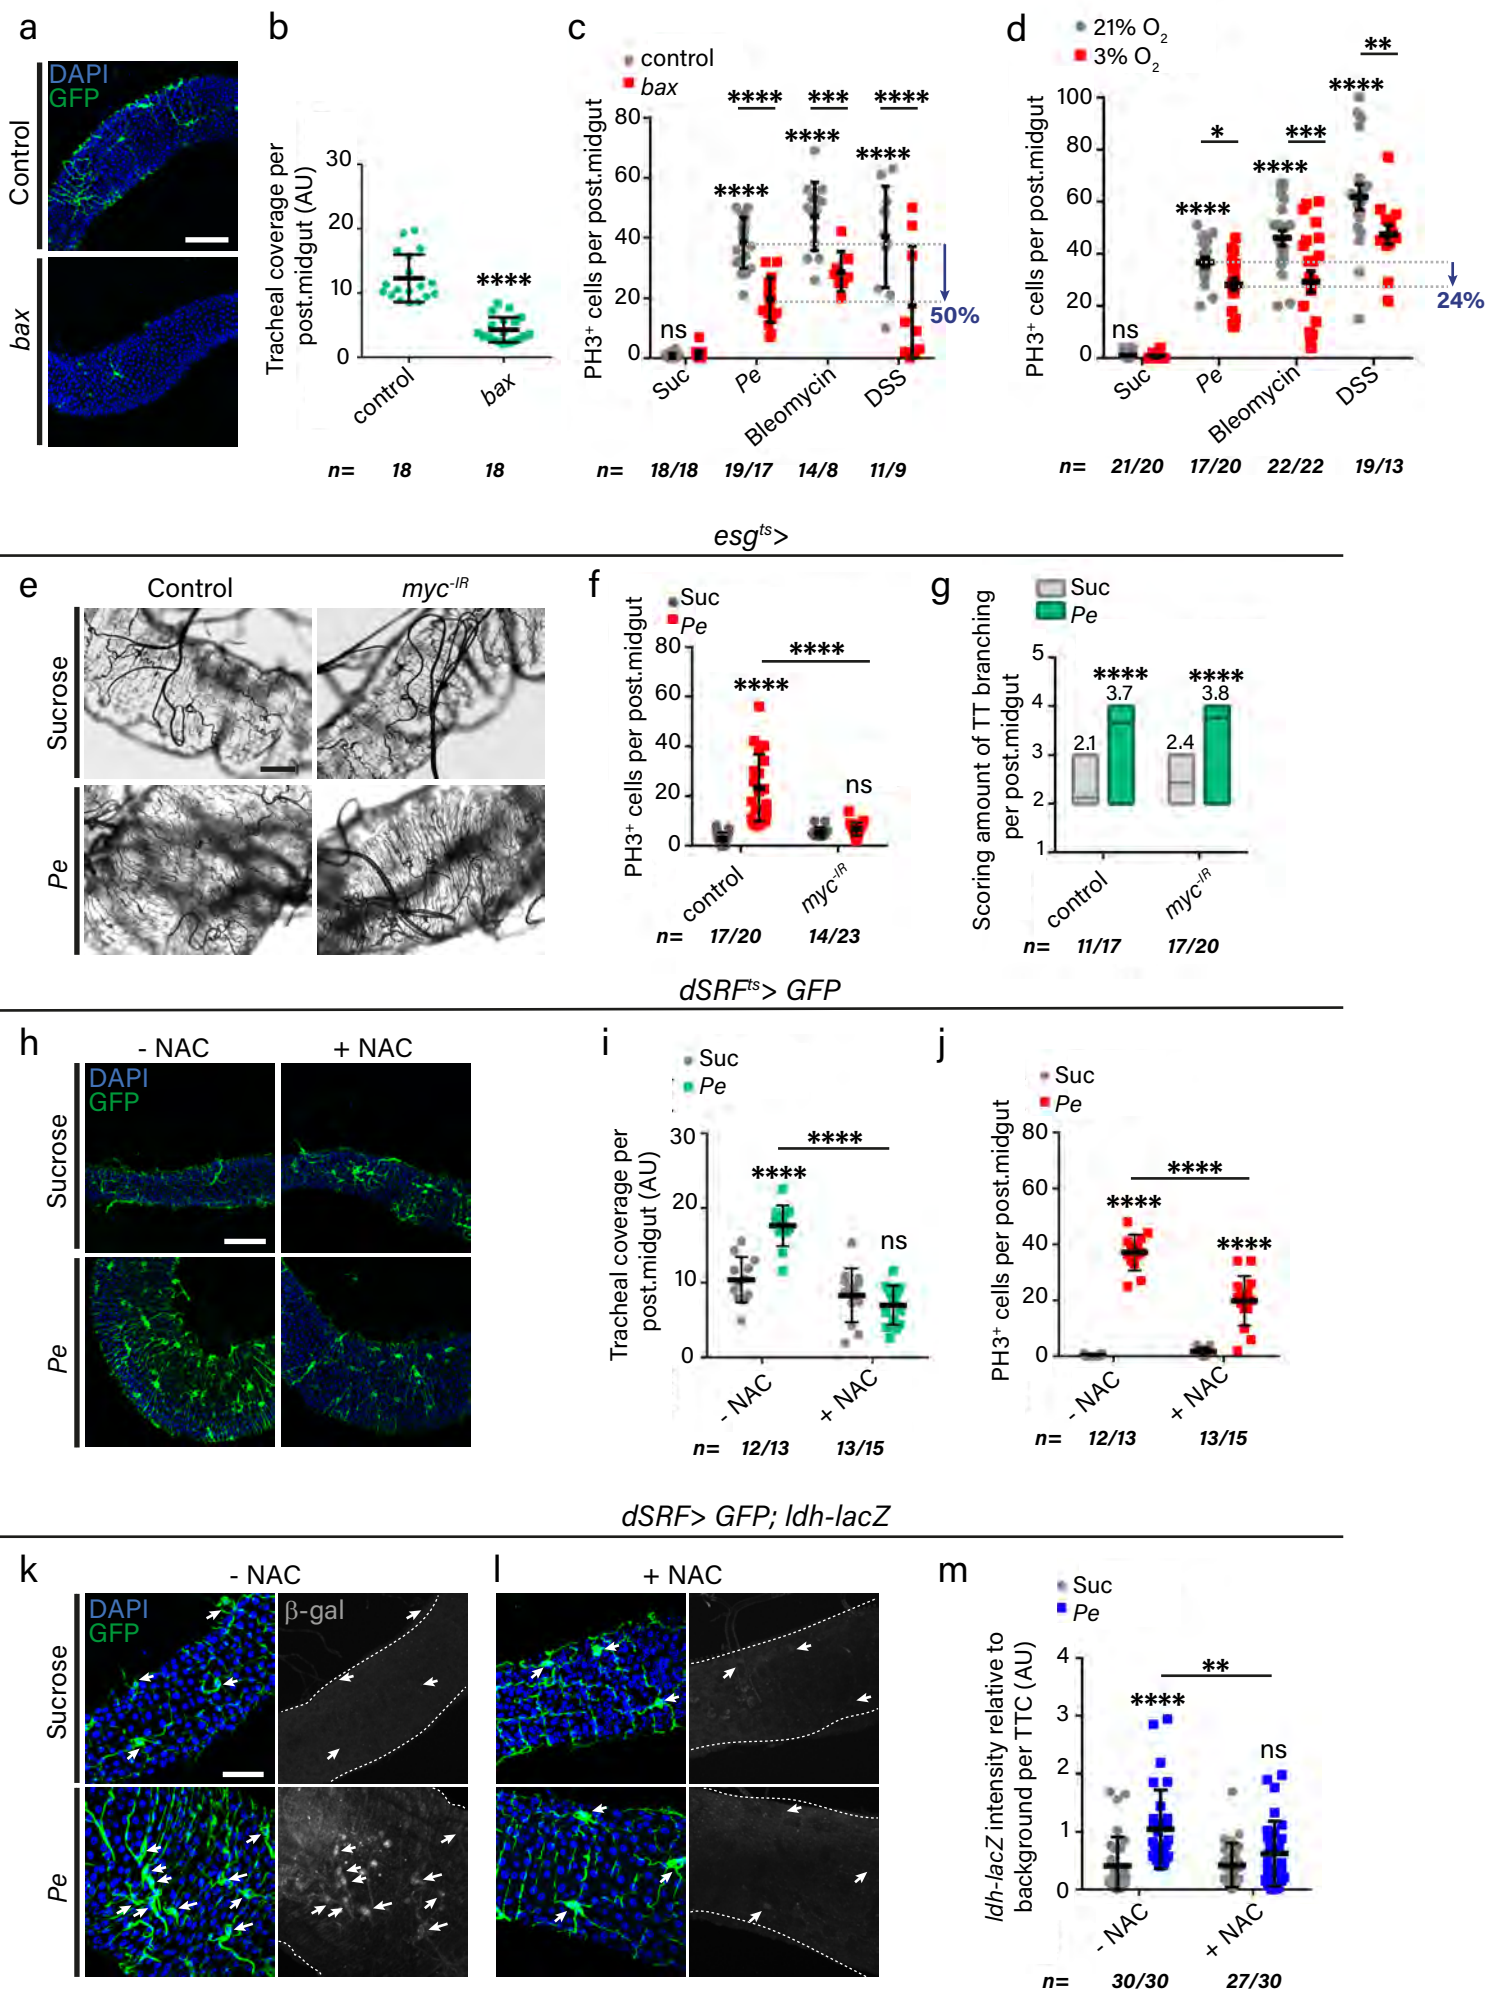



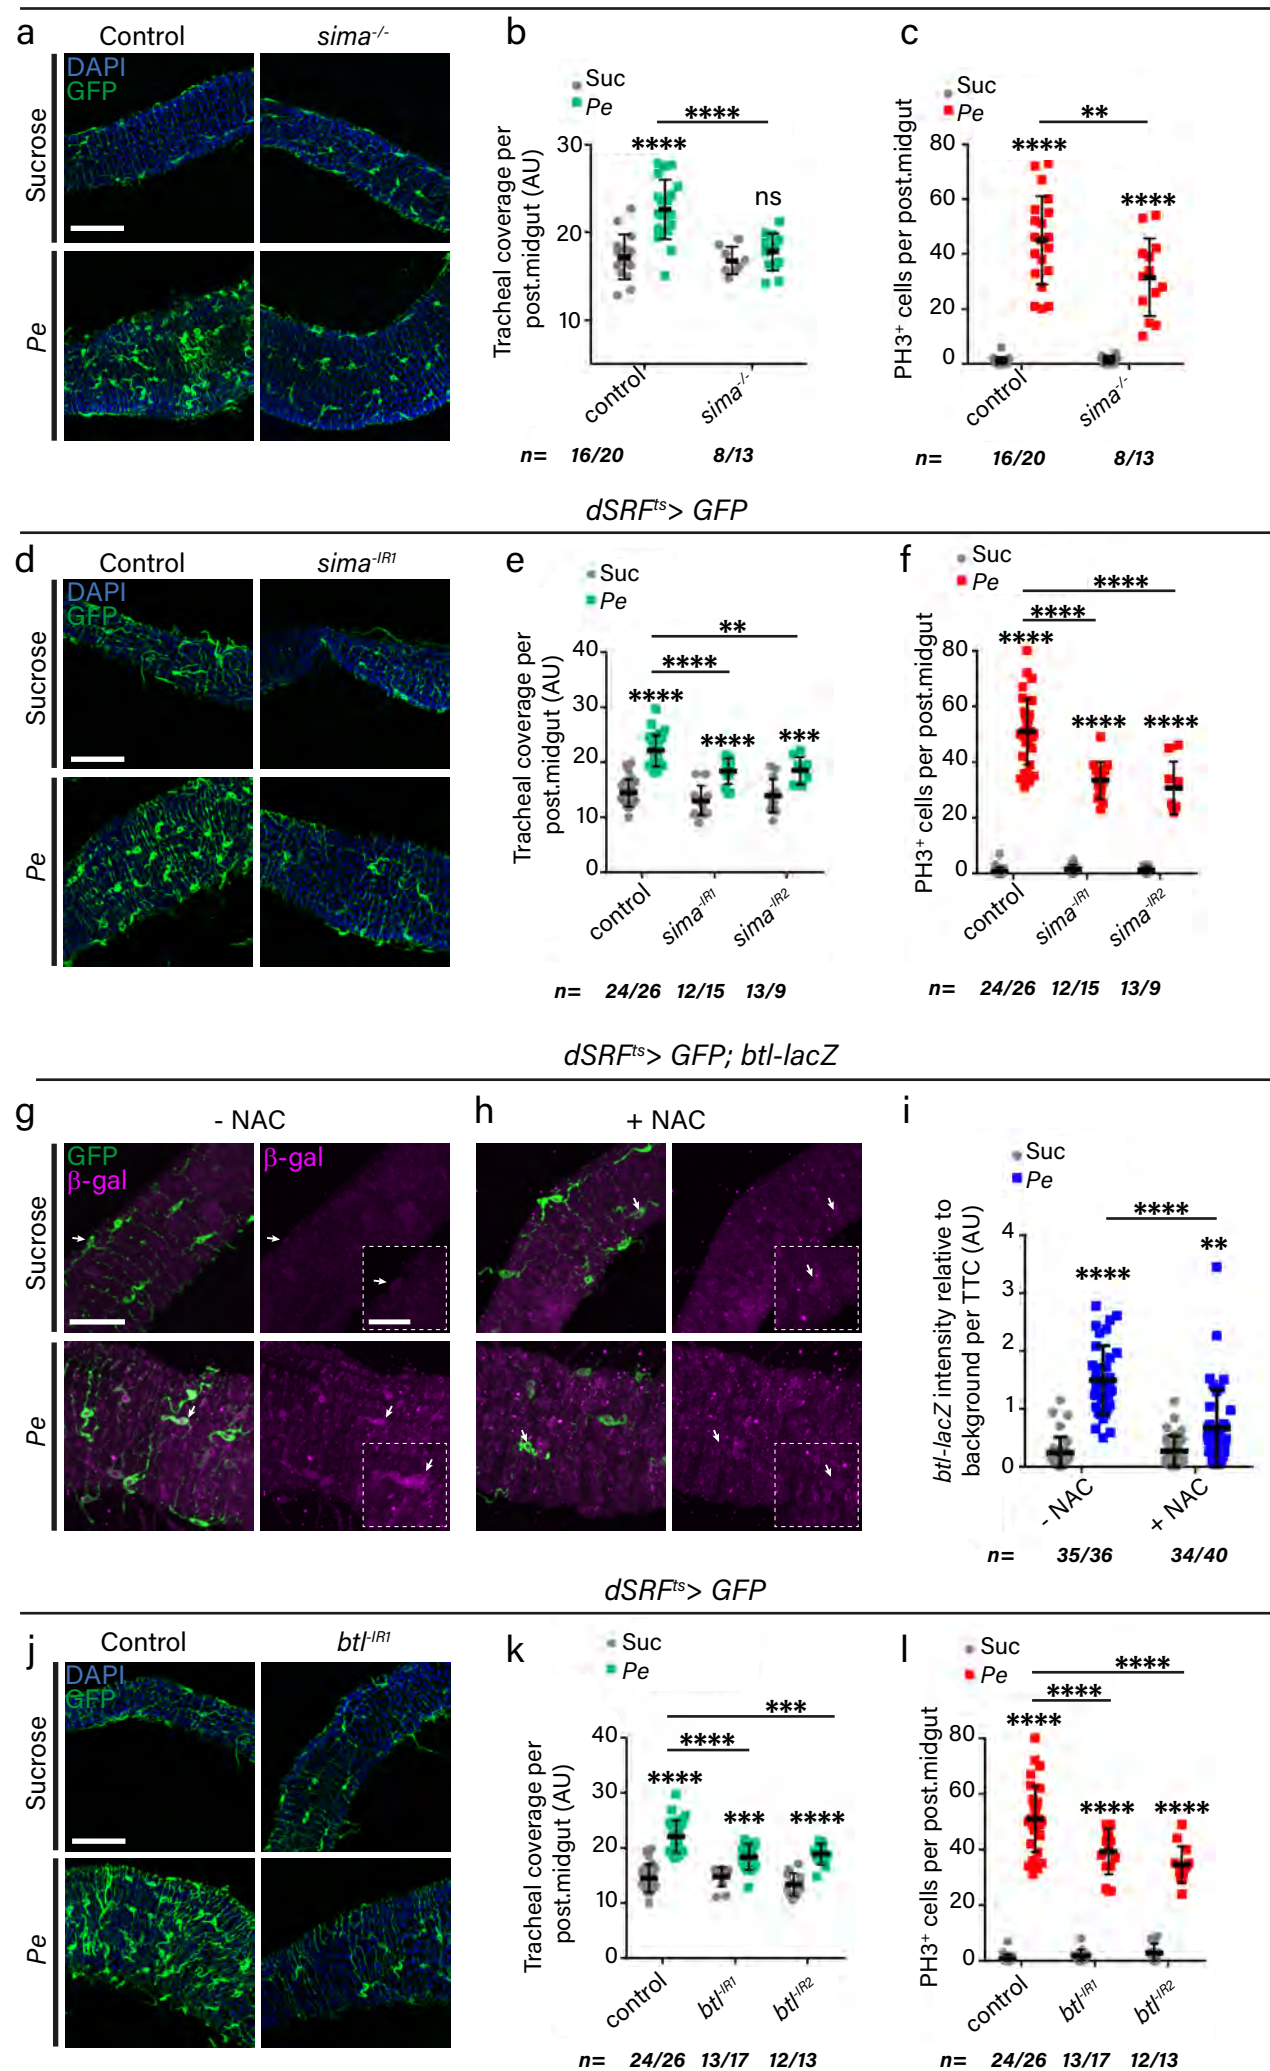



*dSRF<sup>ts</sup> > GFP, bnl-lacZ*

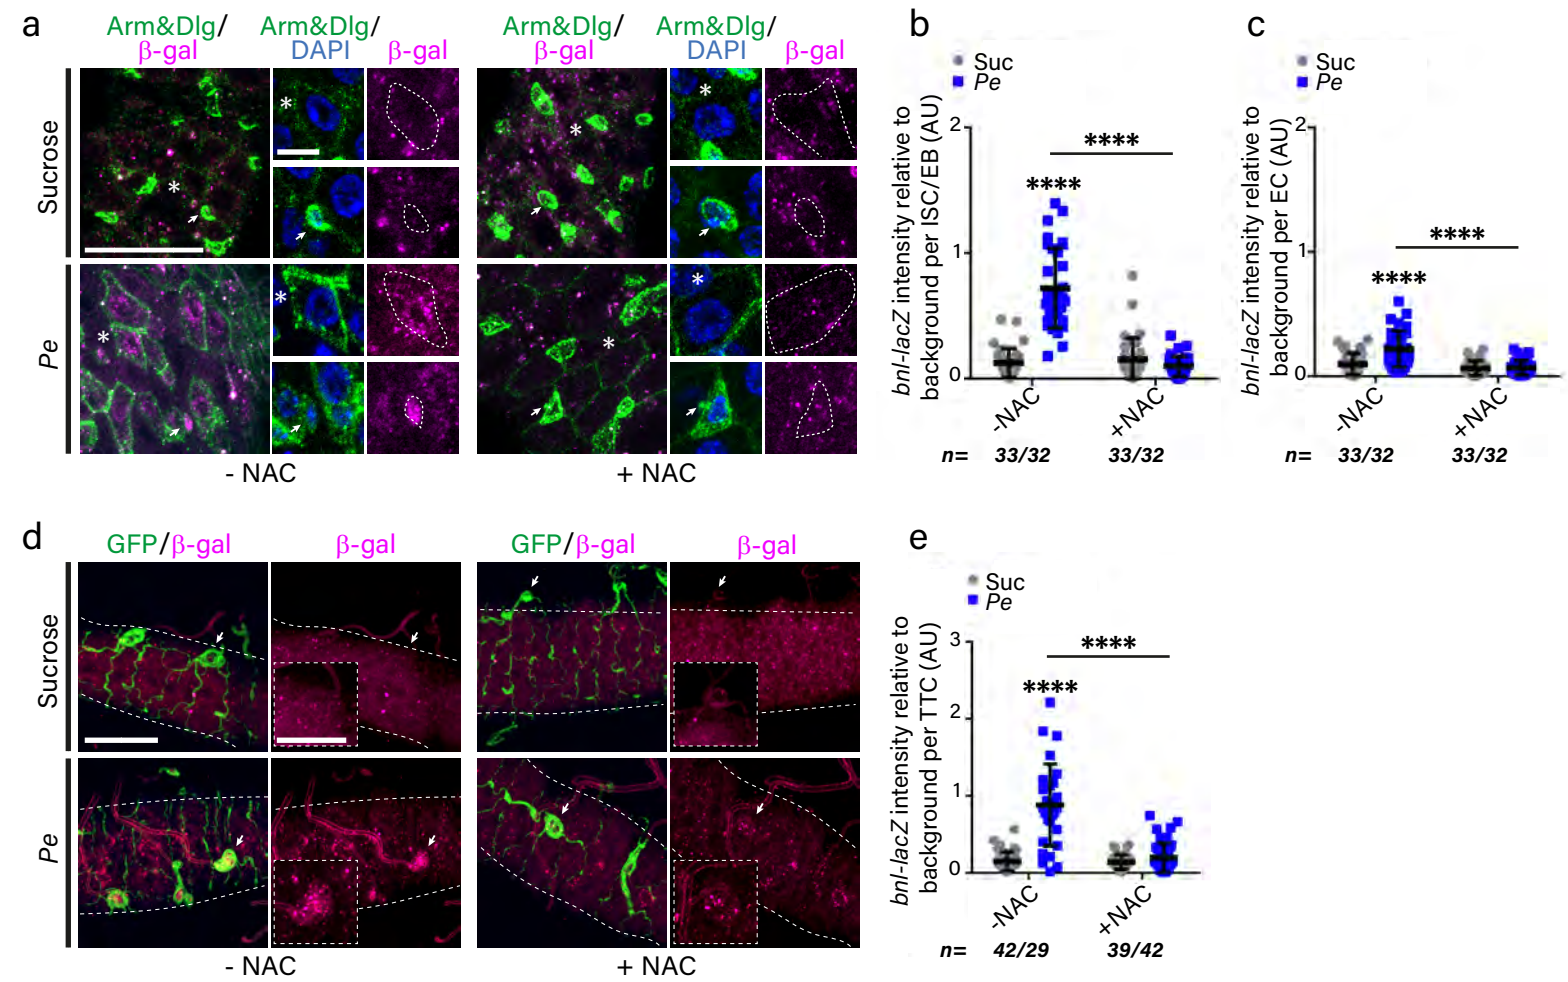

*dSRF<sup>ts</sup> > GFP*

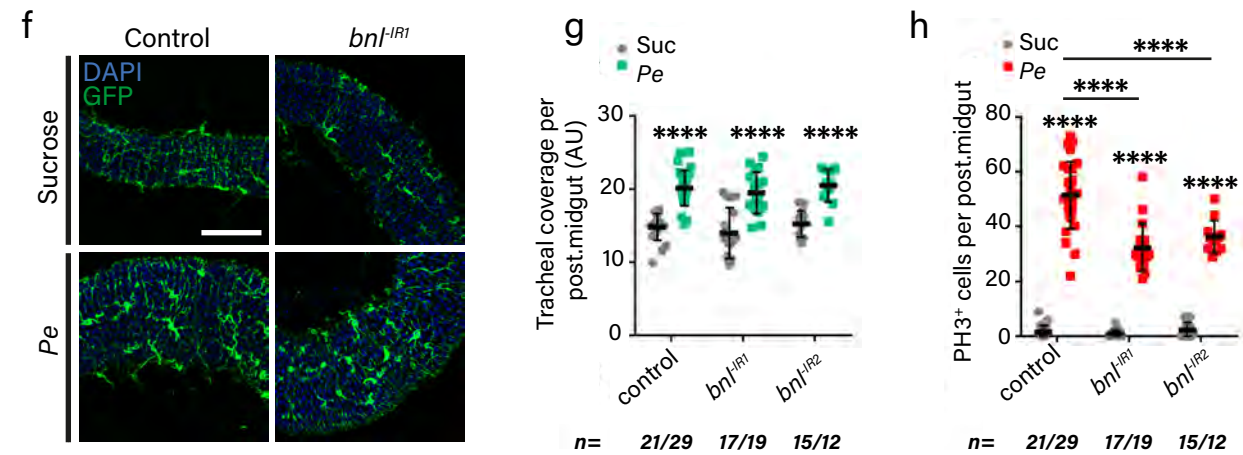

*NP1 >, esg<sup>ts</sup> > GFP*

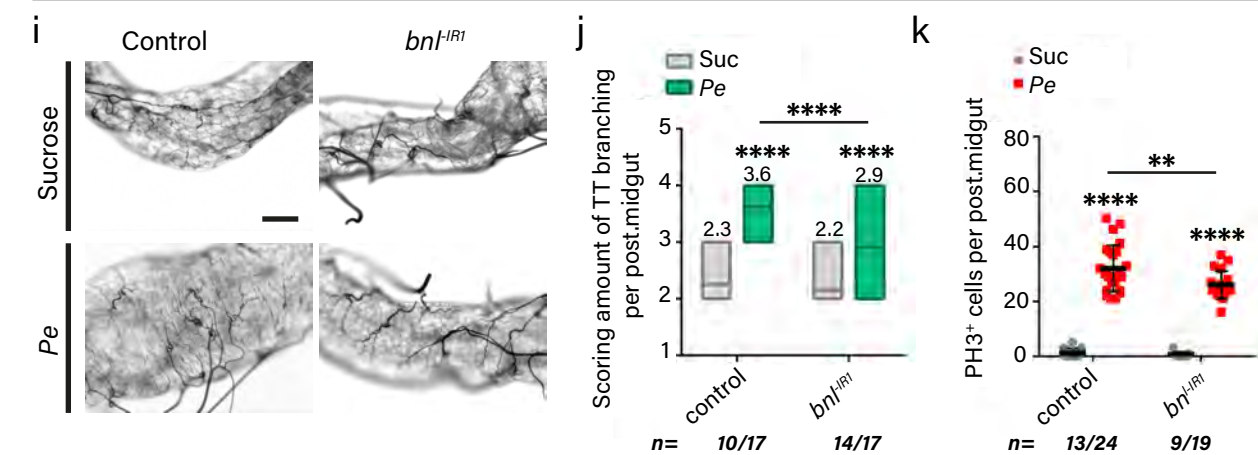

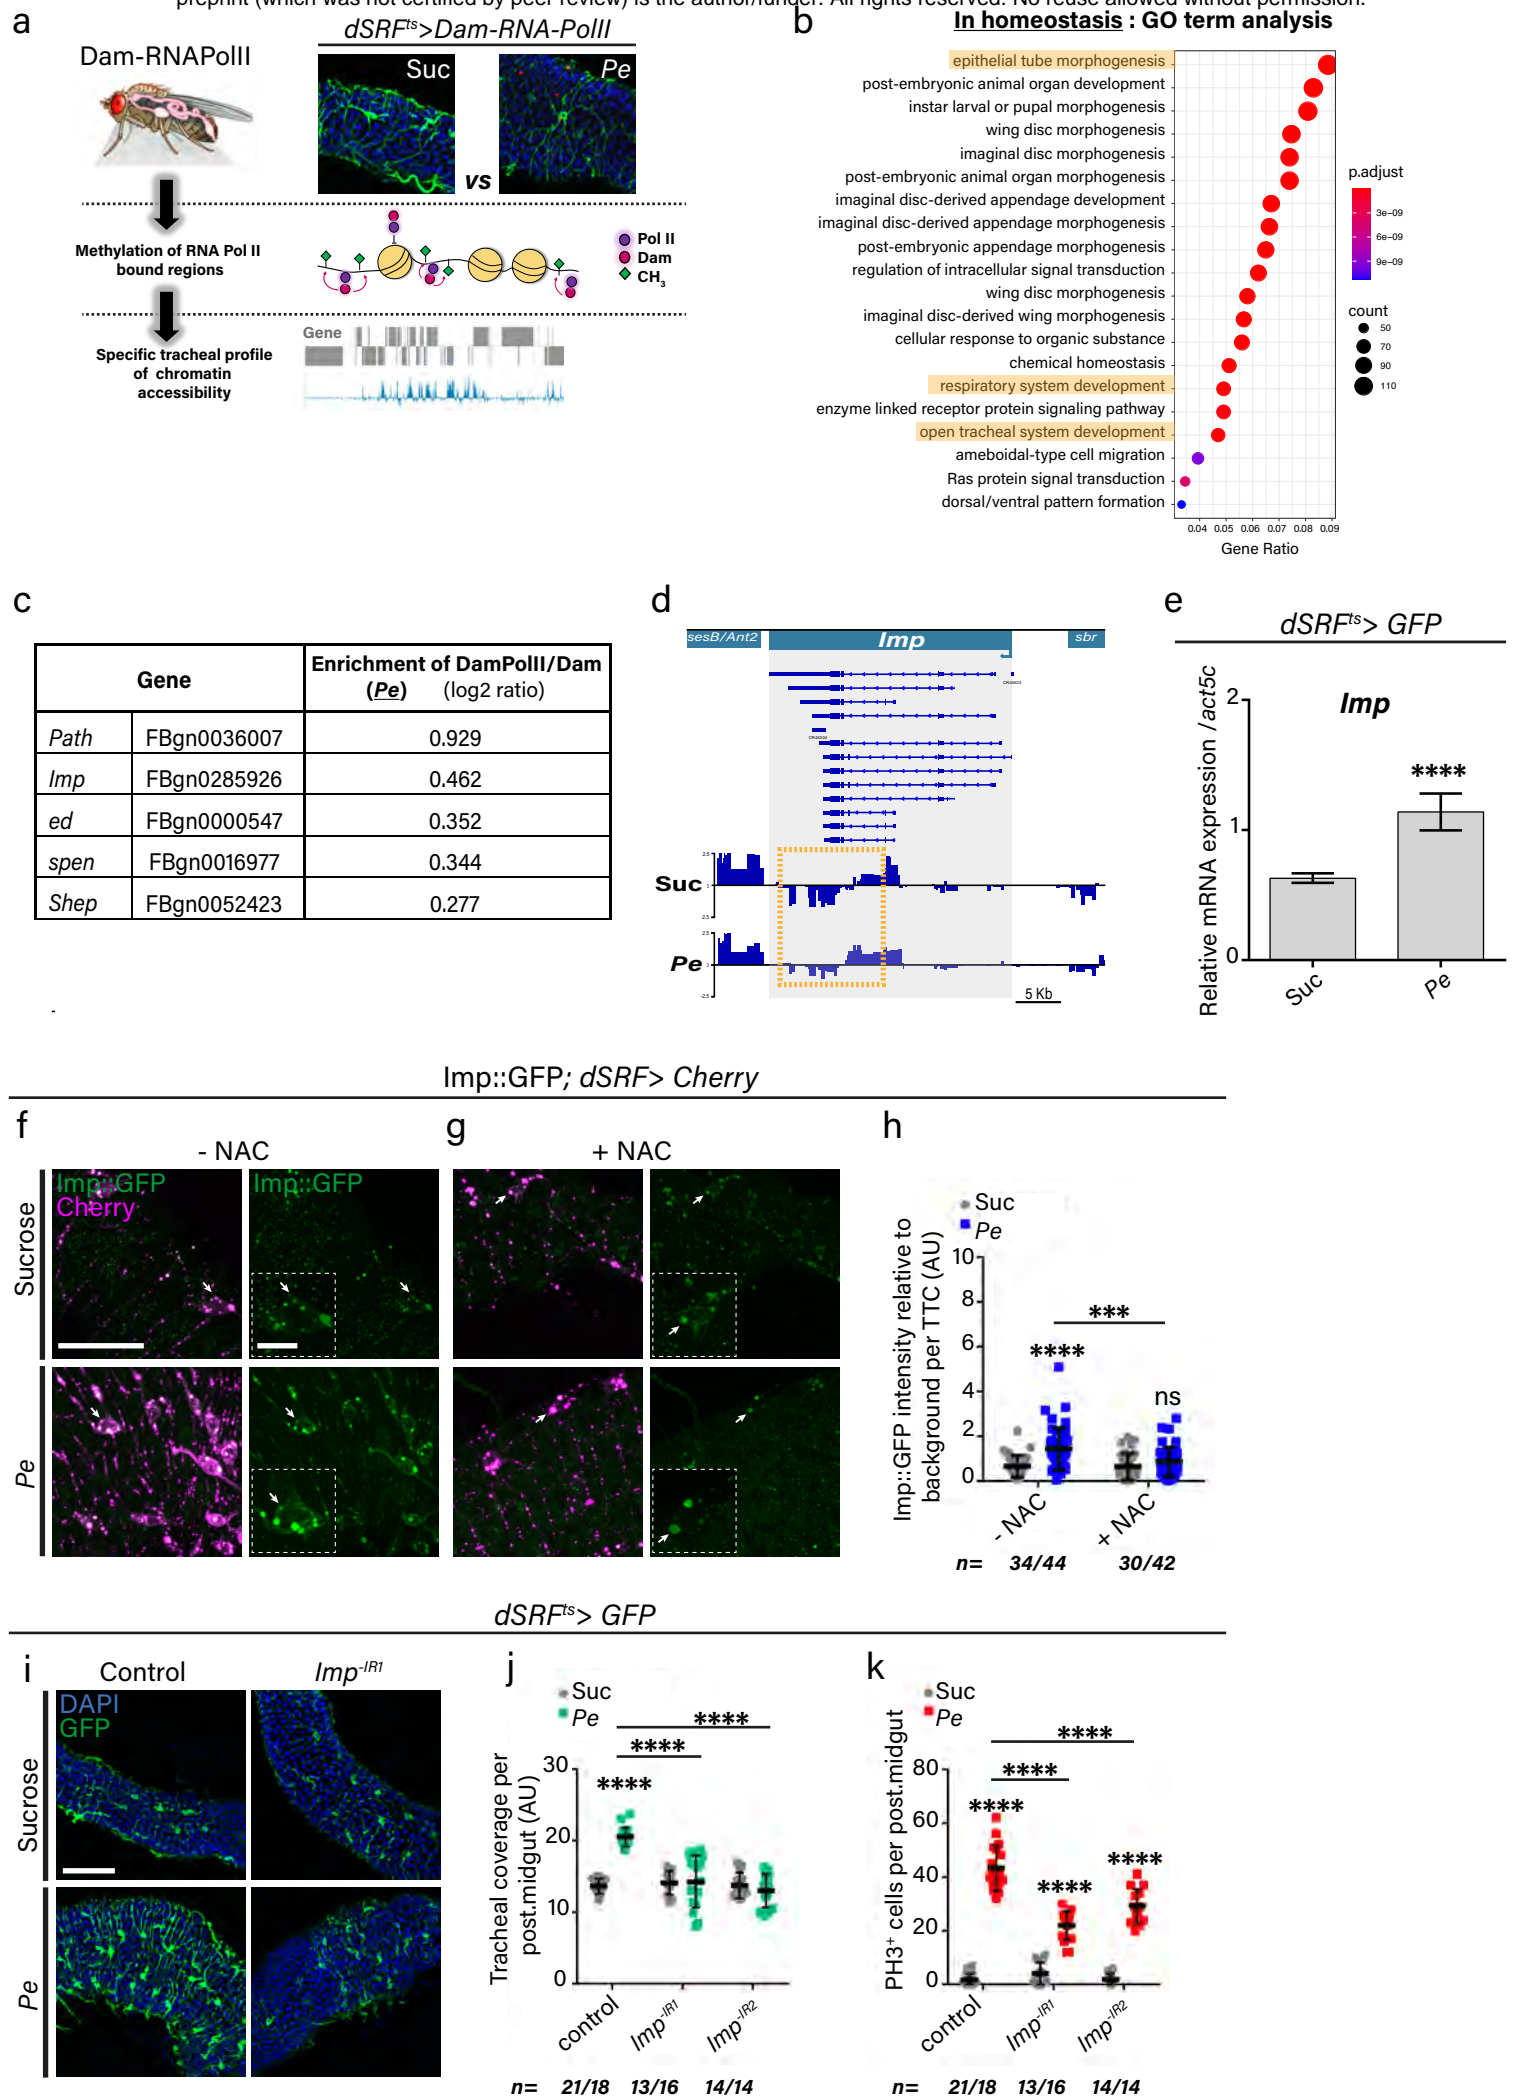

*dSRF<sup>Ts</sup> > GFP*

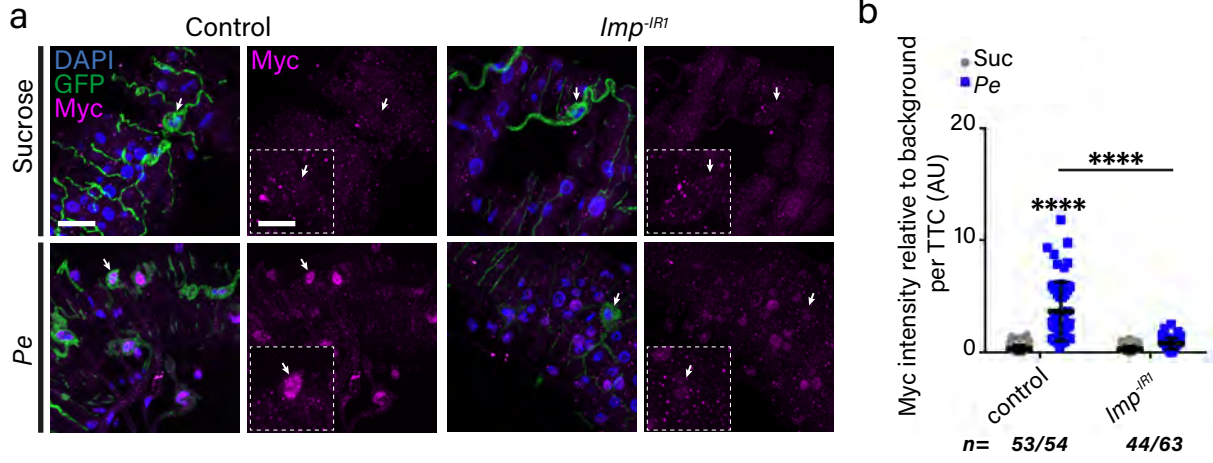

*dSRF<sup>Ts</sup> > GFP*

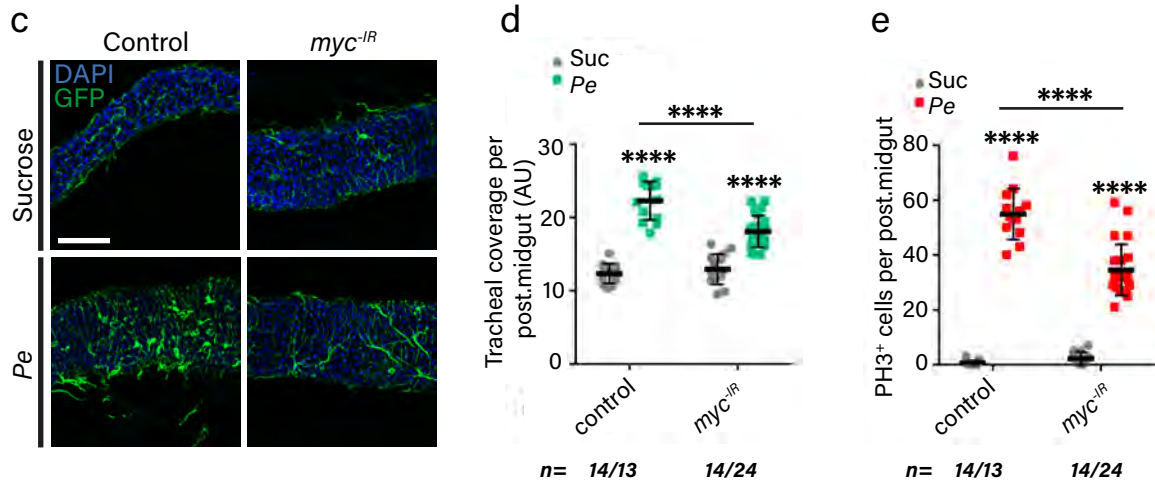



*dSRF<sup>ts</sup> > GFP*

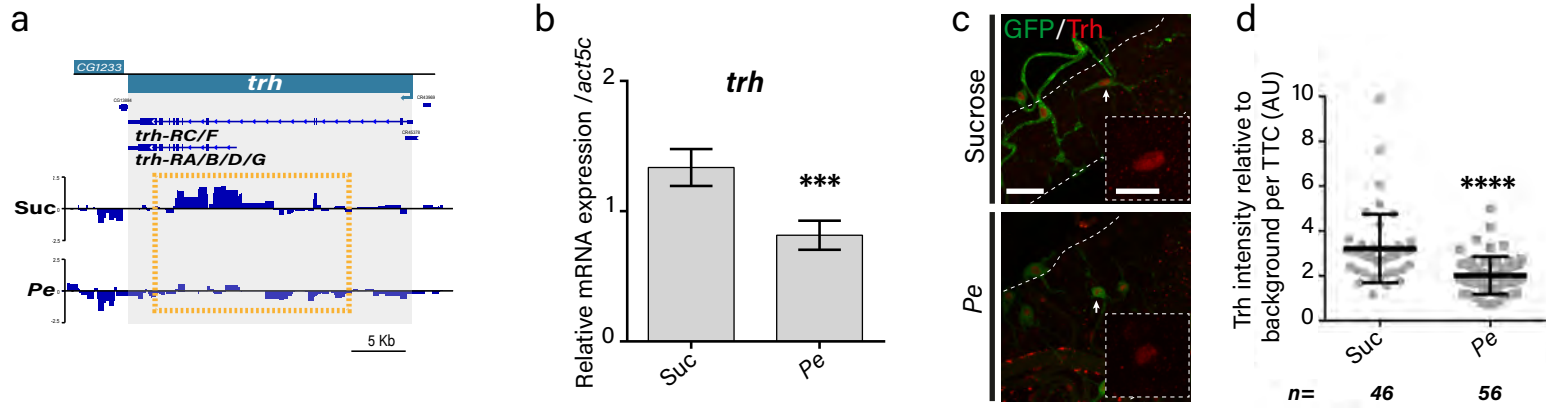

*dSRF<sup>ts</sup> > GFP; trh-lacZ*

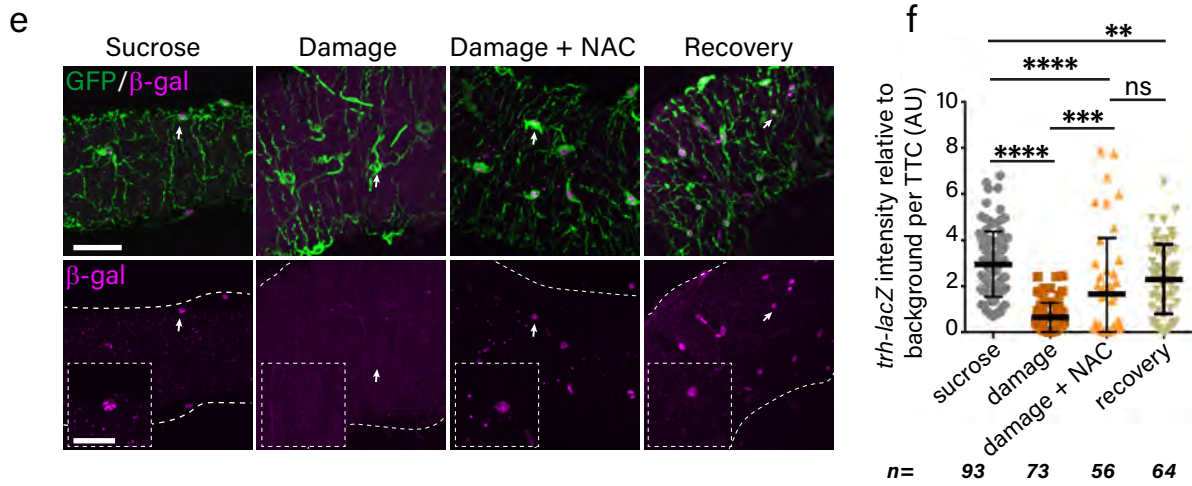

*dSRF<sup>ts</sup> > GFP*

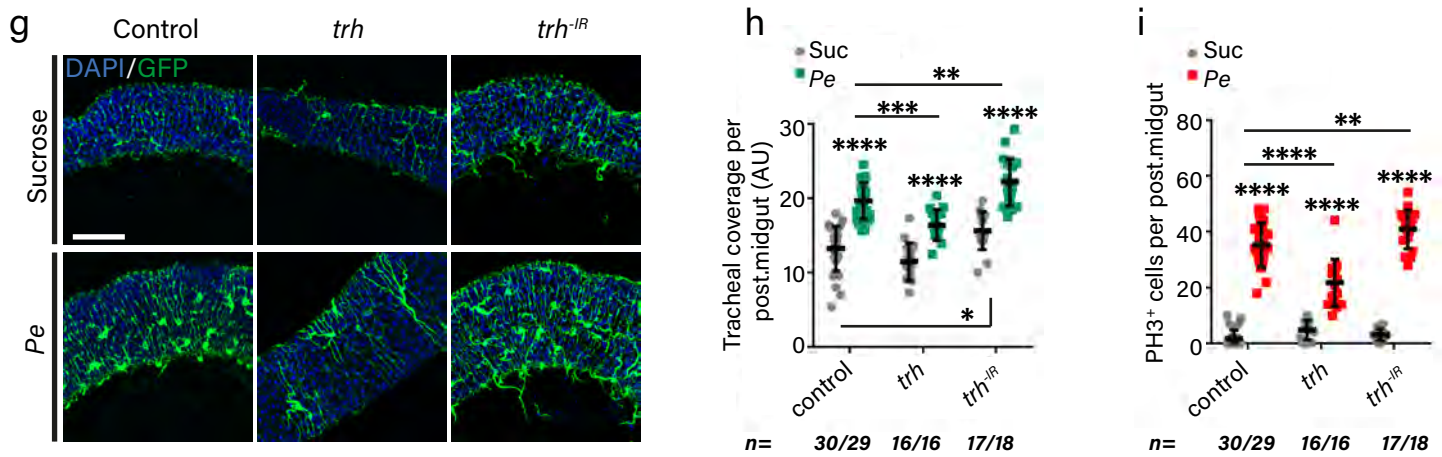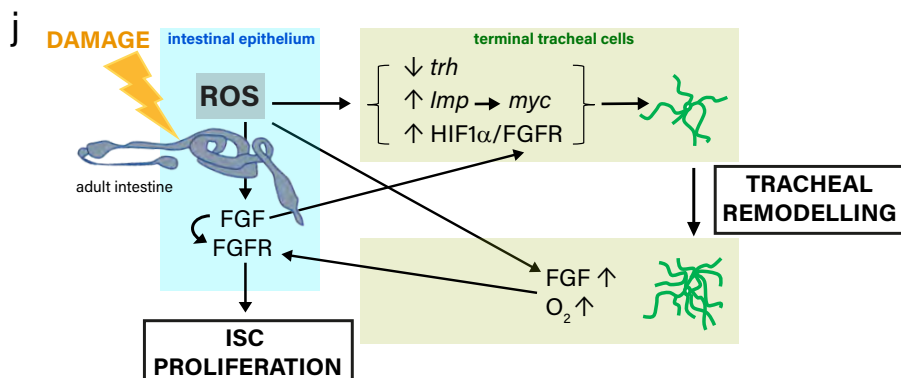

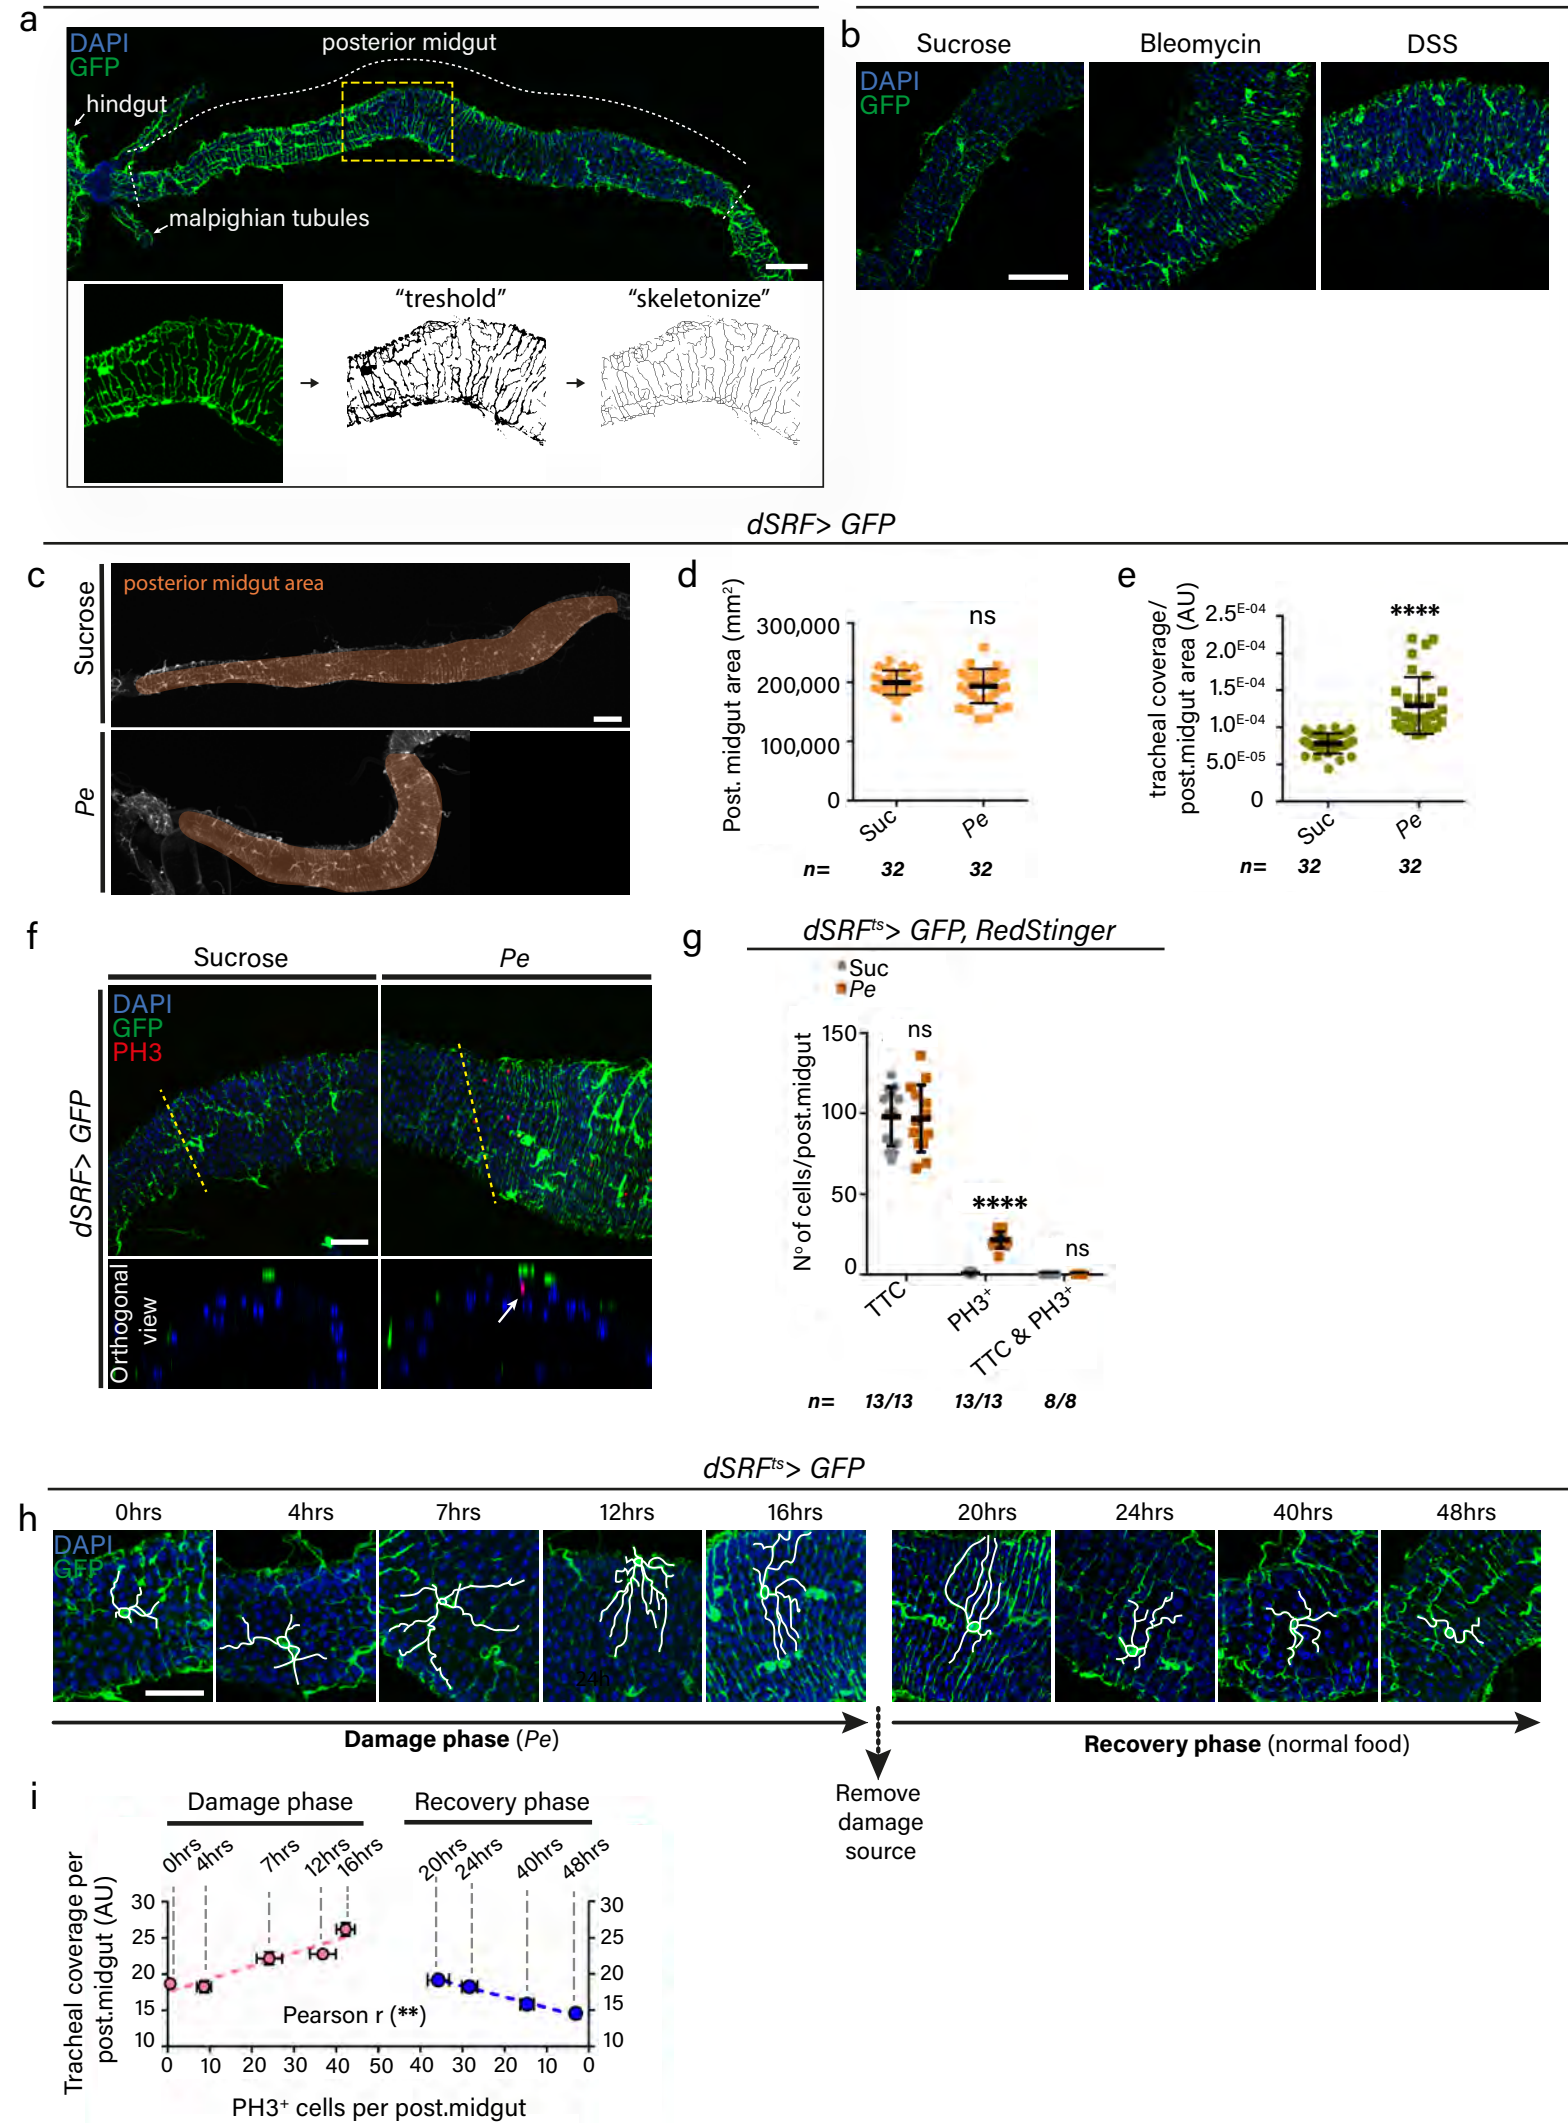



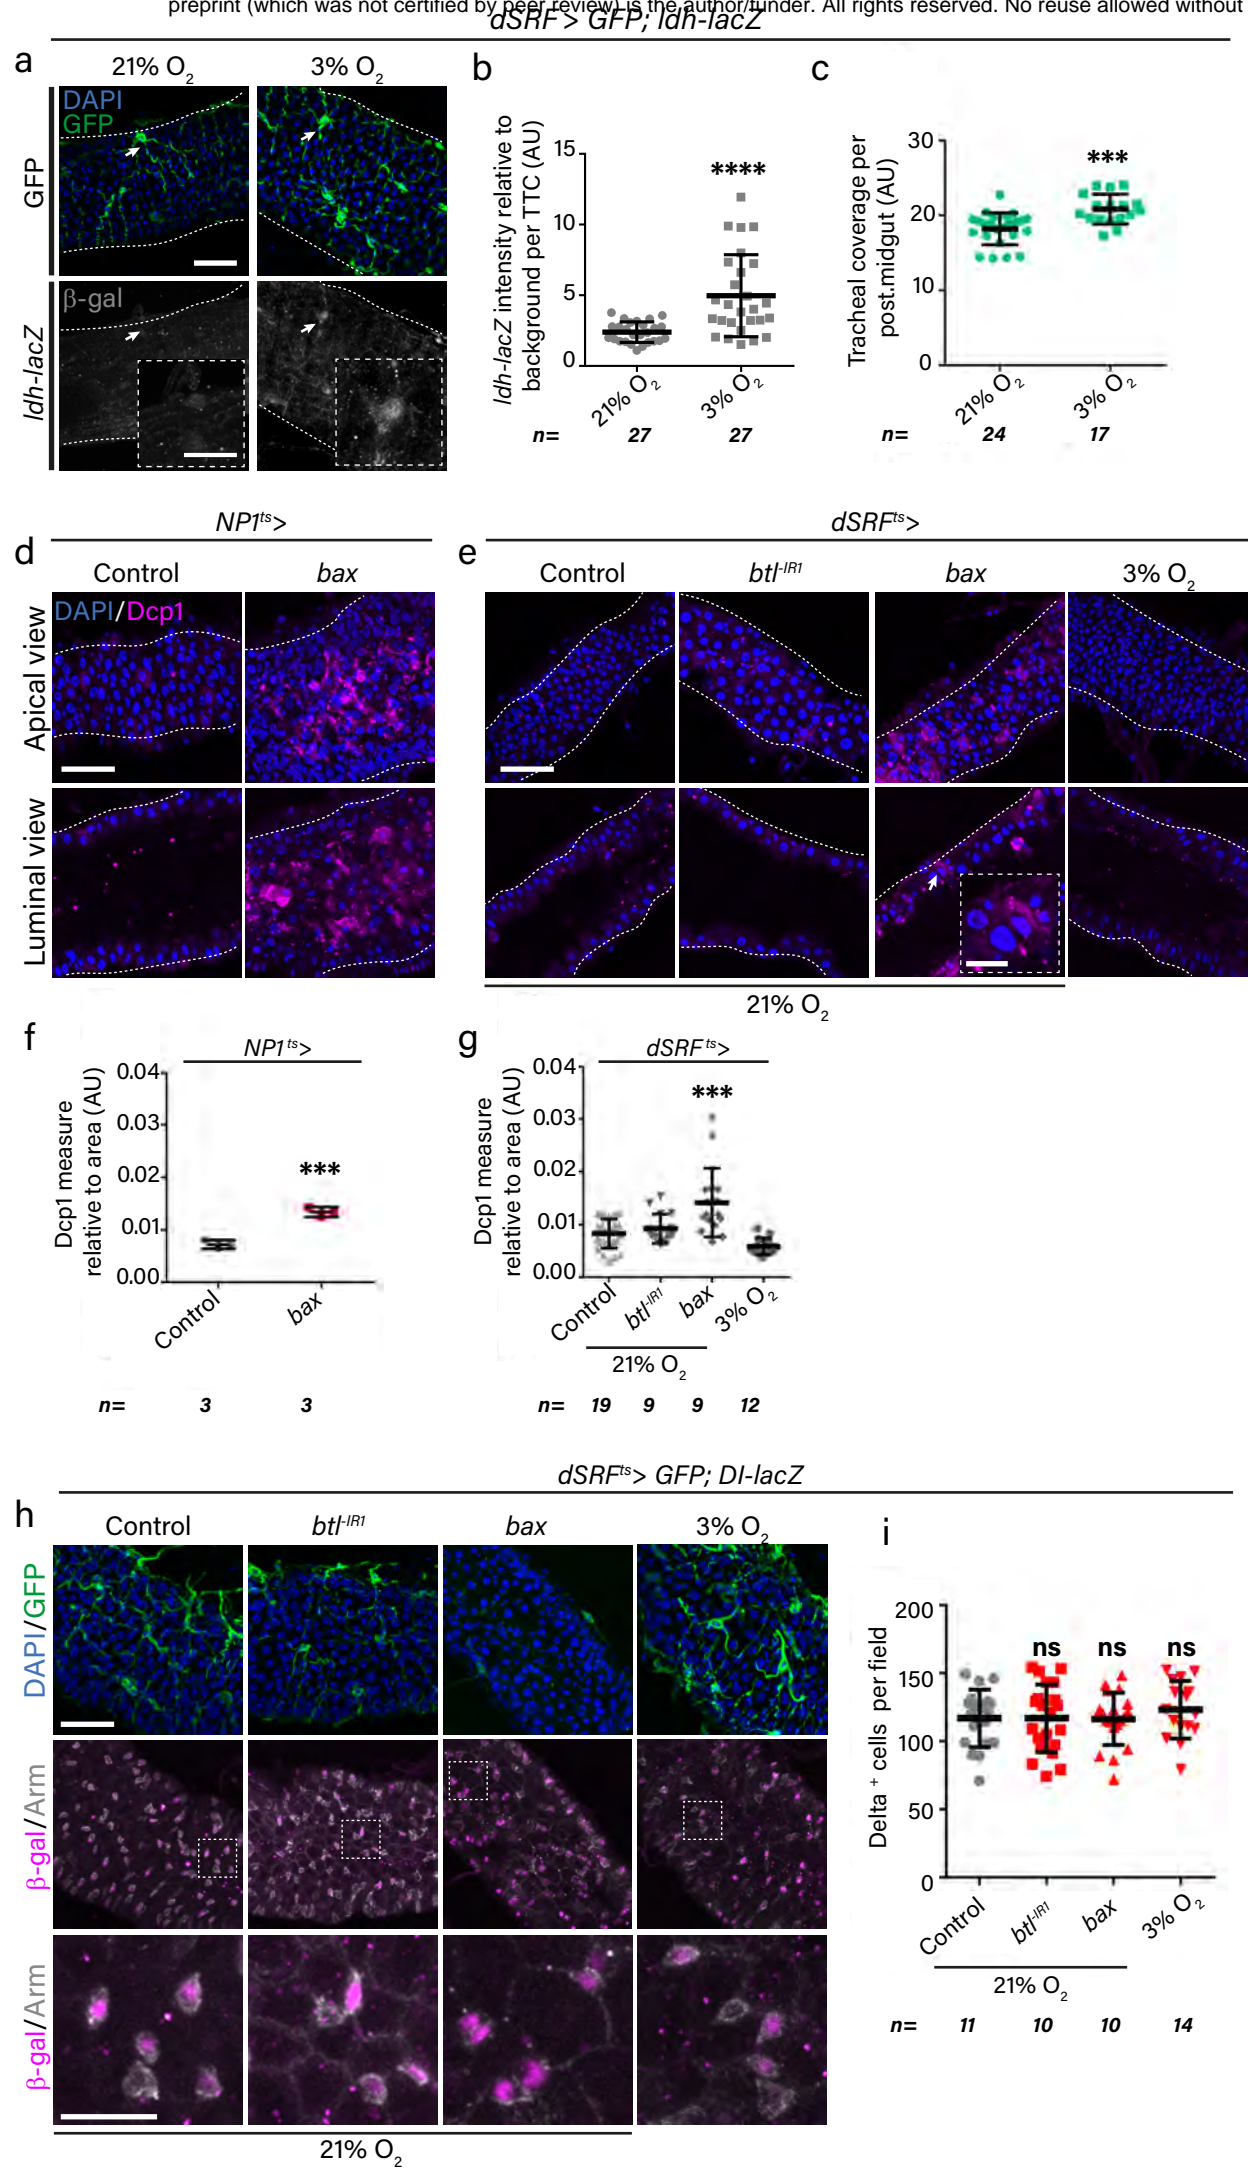

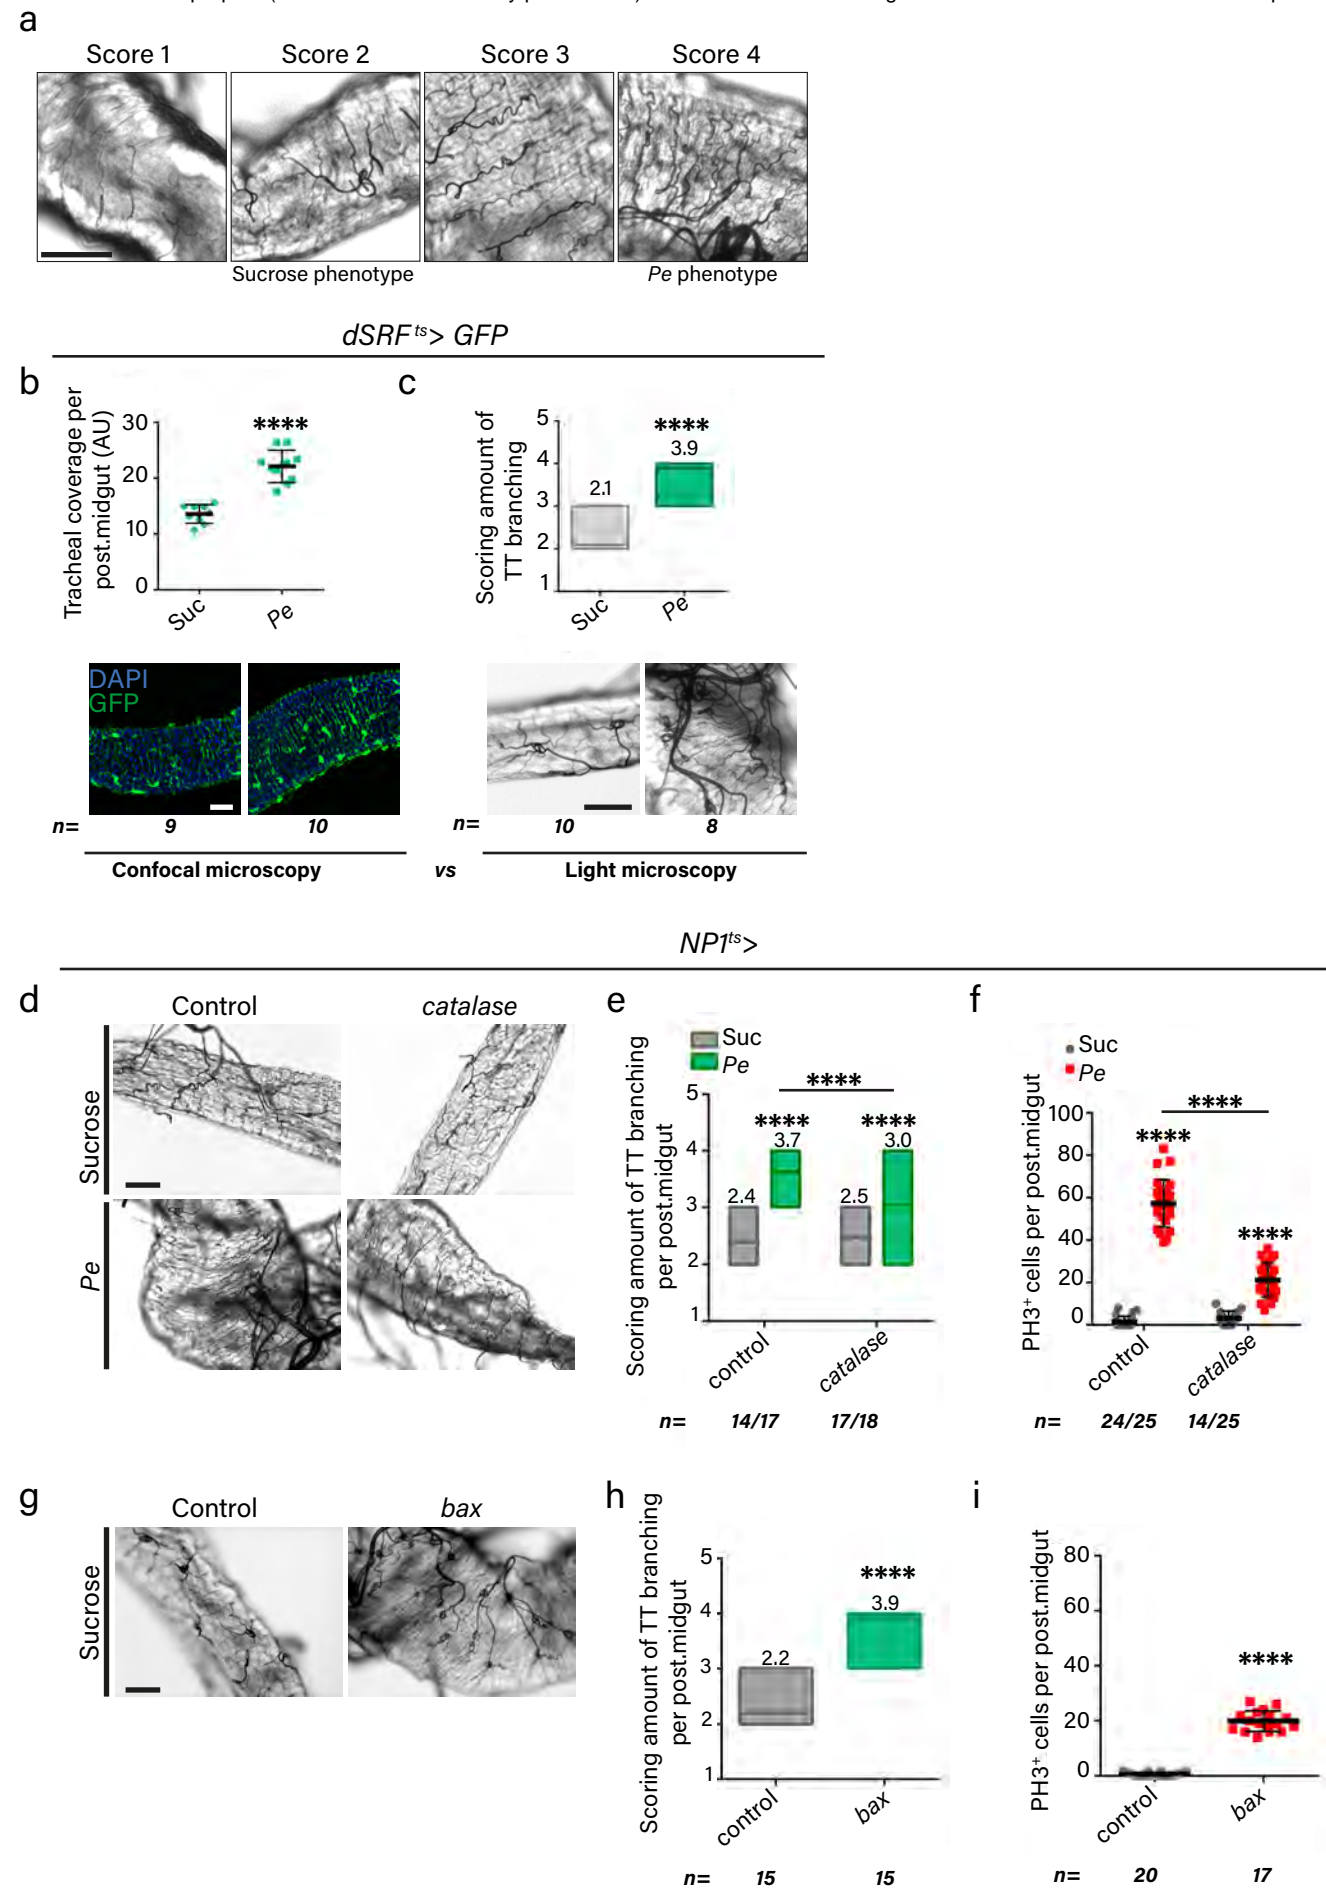

*bs-lacZ*

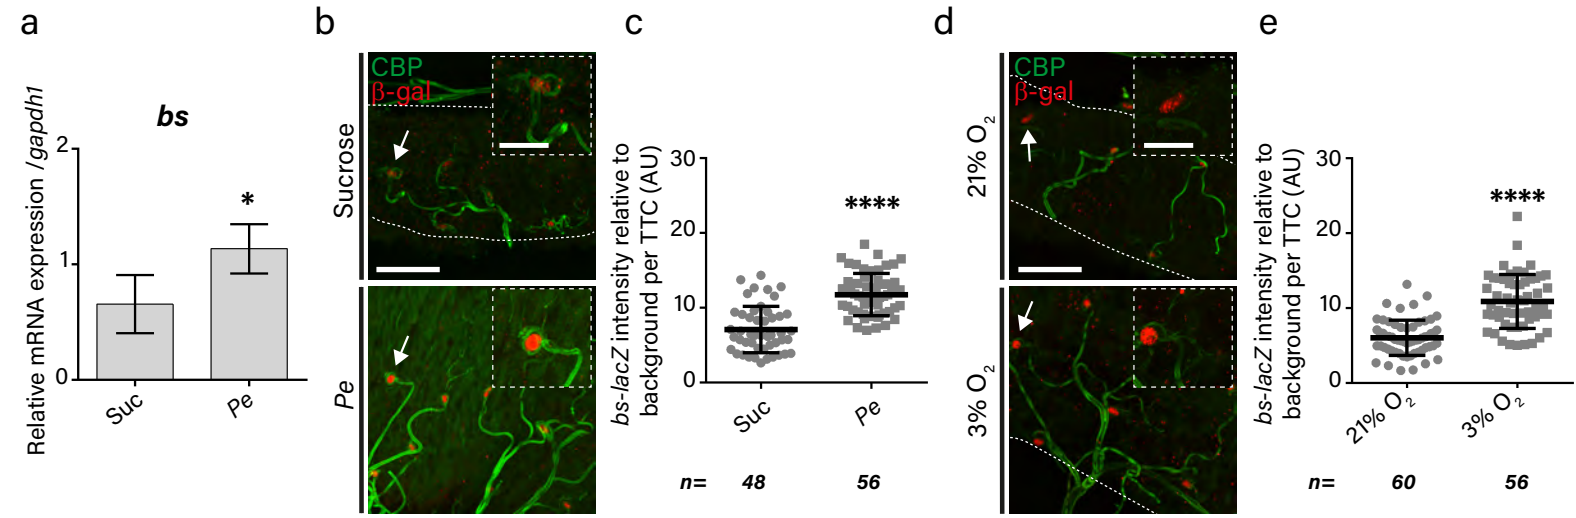

*dSRF<sup>ts</sup> > GFP*

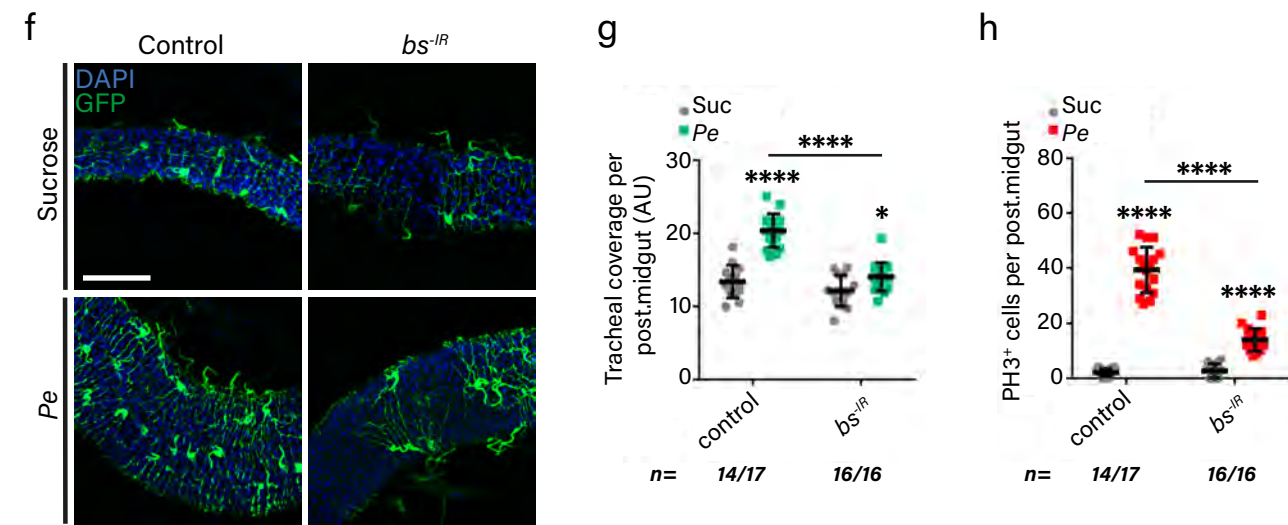



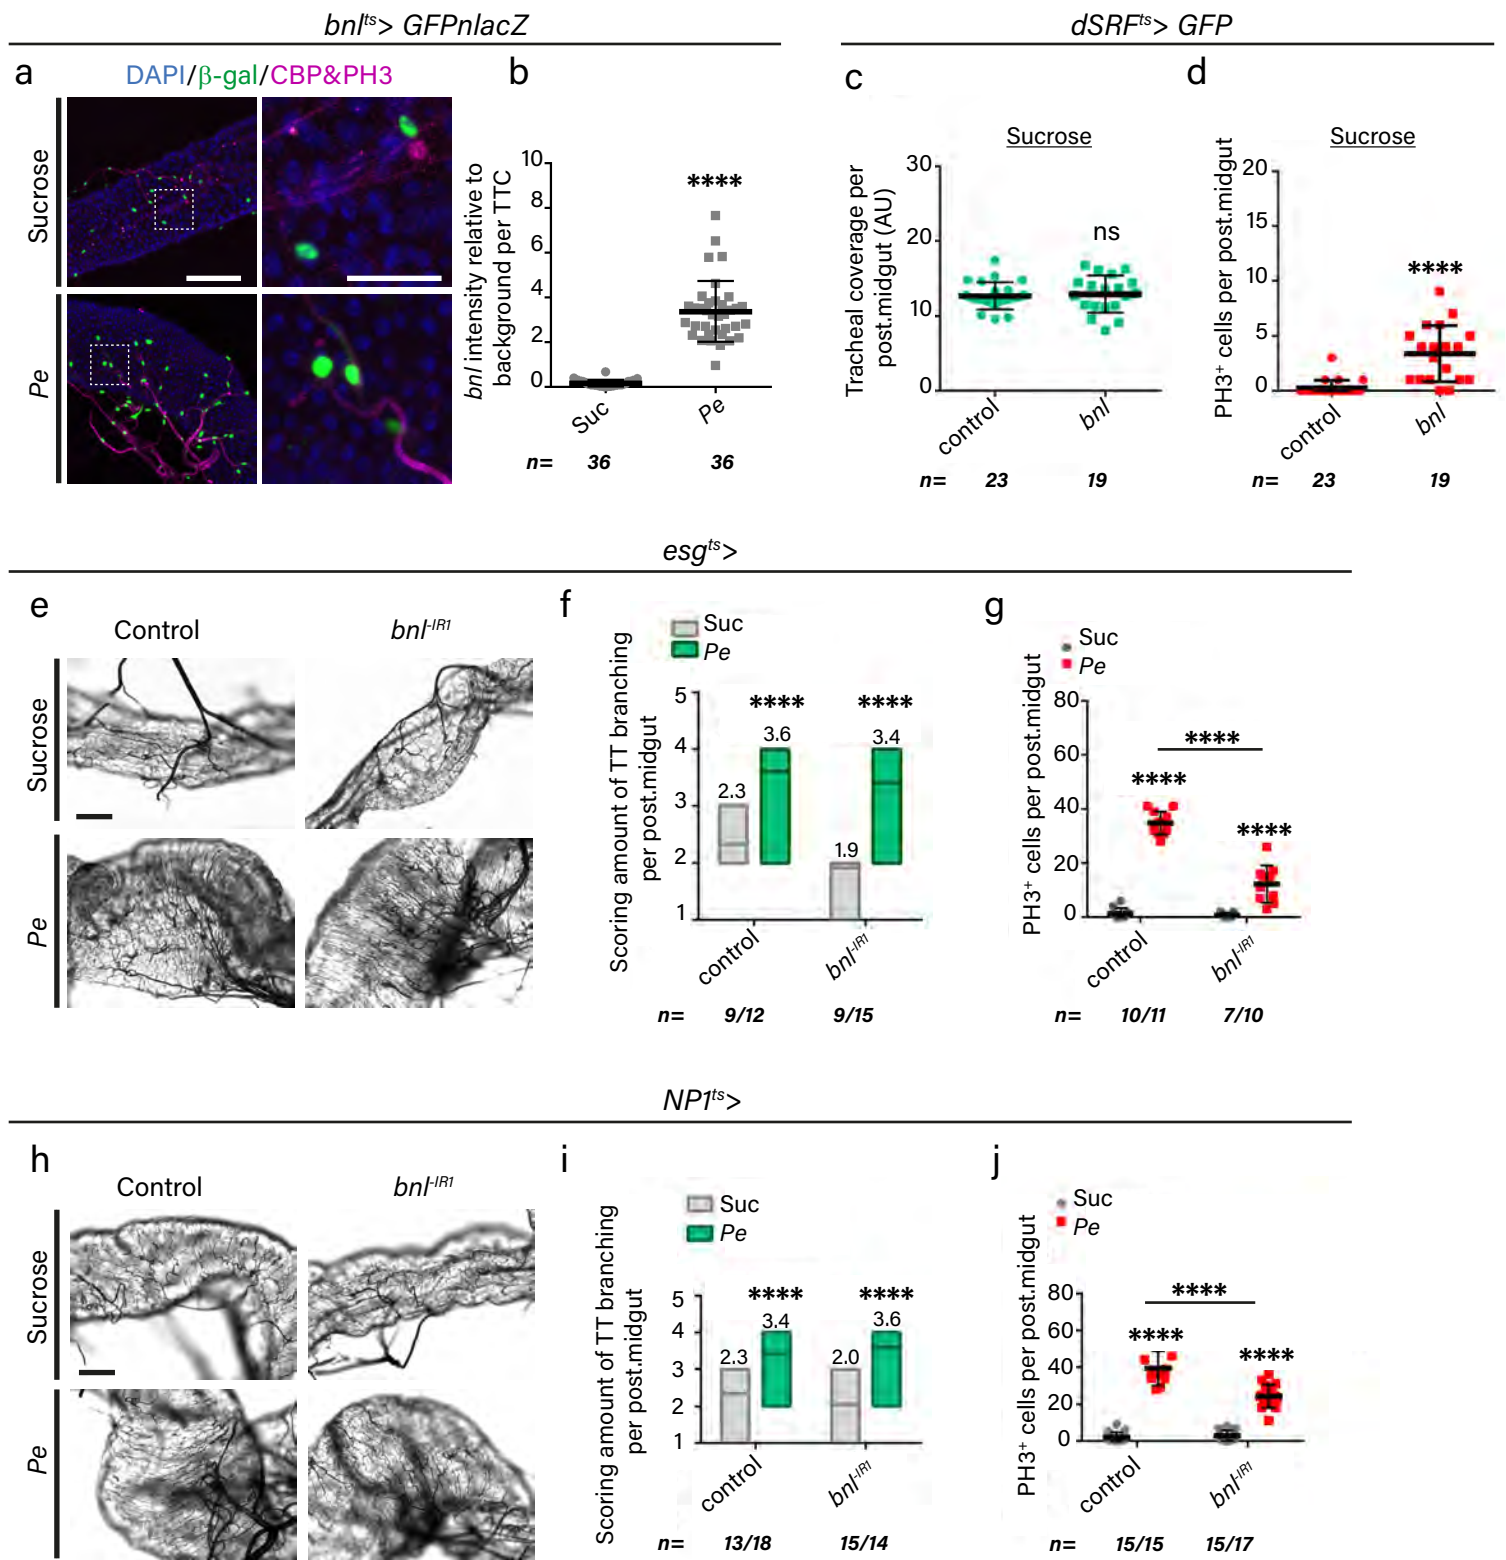

*esg<sup>ts</sup> > GFP*

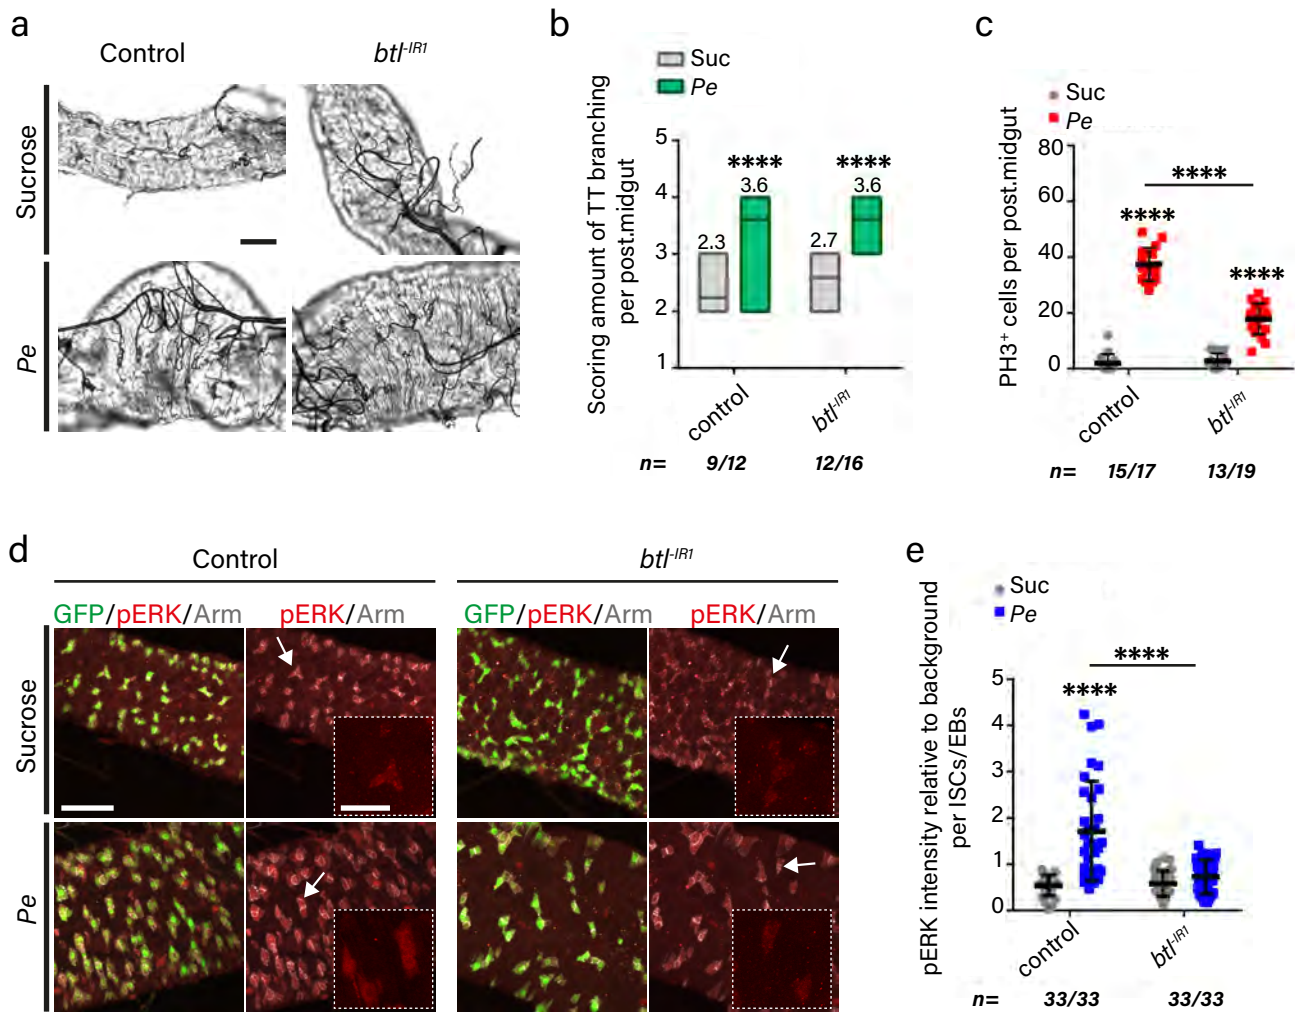

a

**Pearson correlation of average scores per genes**

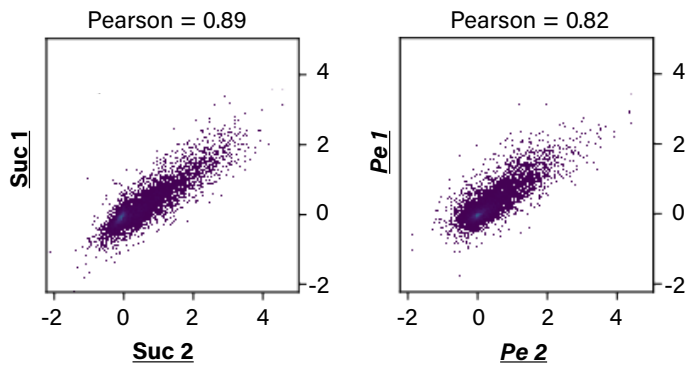

b

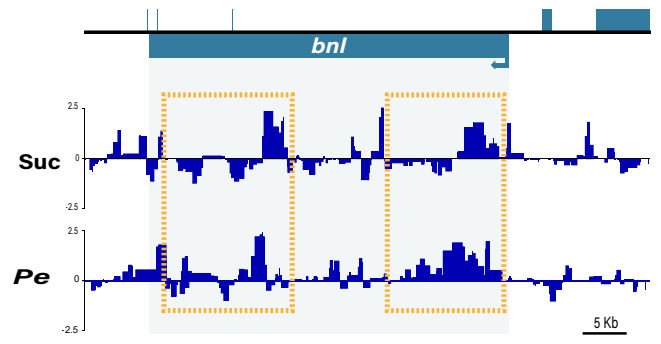

Source: https://www.biorxiv.org/content/10.1101/2021.01.10.426079v2.full.pdf
